# Supplementary material for: Guanabenz ameliorates disease in vanishing white matter mice in contrast to sephin1
Source: PubMed Central journal article supplement — Ann Clin Transl Neurol. 2022 Jul 1;9(8):1147–62. doi: 10.1002/acn3.51611 (PMC9380178; doi:10.1002/acn3.51611), 2022-07-01
Supplement: ACN3-9-1147-s012.pdf [file ACN3-9-1147-s012.pdf]

**Figure 1**

| Table Analyzed              | p-eIF2α/eIF2α 4h WT plac vs WT GBZ10           |
|-----------------------------|------------------------------------------------|
| Unpaired t test             |                                                |
| P value                     | 0,1328                                         |
| P value summary             | ns                                             |
| One- or two-tailed P value? | One-tailed                                     |
| t, df                       | t=1,530, df=2                                  |
| Mean WT placebo             | 0,382                                          |
| Mean WT GBZ10               | 0,2629                                         |
| 95% confidence interval     | -0,4539 to 0,2157                              |
| <b>Table Analyzed</b>       | <b>p-eIF2α/eIF2α 4h 2b5 plac vs 2b5 GBZ10</b>  |
| Unpaired t test             |                                                |
| P value                     | 0,0763                                         |
| P value summary             | ns                                             |
| One- or two-tailed P value? | One-tailed                                     |
| t, df                       | t=2,257, df=2                                  |
| Mean 2b5ho placebo          | 0,2703                                         |
| Mean 2b5ho GBZ10            | 0,1806                                         |
| 95% confidence interval     | -0,2606 to 0,08128                             |
| <b>Table Analyzed</b>       | <b>p-eIF2α/eIF2α 24h WT plac vs WT GBZ10</b>   |
| Unpaired t test             |                                                |
| P value                     | 0,8267                                         |
| P value summary             | ns                                             |
| One- or two-tailed P value? | Two-tailed                                     |
| t, df                       | t=0,2488, df=2                                 |
| Mean WT placebo             | 0,3705                                         |
| Mean WT GBZ10               | 0,385                                          |
| 95% confidence interval     | -0,2361 to 0,2651                              |
| <b>Table Analyzed</b>       | <b>p-eIF2α/eIF2α 24h 2b5 plac vs 2b5 GBZ10</b> |
| Unpaired t test             |                                                |
| P value                     | 0,7169                                         |
| P value summary             | ns                                             |
| One- or two-tailed P value? | Two-tailed                                     |
| t, df                       | t=0,4174, df=2                                 |
| Mean 2b5ho placebo          | 0,2743                                         |
| Mean 2b5ho GBZ10            | 0,2859                                         |
| 95% confidence interval     | -0,1081 to 0,1313                              |
| <b>Table Analyzed</b>       | <b>Ddit3 4h WT plac vs WT GBZ10</b>            |
| Unpaired t test             |                                                |
| P value                     | 0,2993                                         |
| P value summary             | ns                                             |
| One- or two-tailed P value? | One-tailed                                     |
| t, df                       | t=0,6198, df=2                                 |
| Mean WT placebo             | 0,01832                                        |
| Mean WT GBZ10               | 0,0167                                         |
| 95% confidence interval     | -0,01283 to 0,009595                           |
| <b>Table Analyzed</b>       | <b>Ddit3 4h 2b5 plac vs 2b5 GBZ10</b>          |
| Unpaired t test             |                                                |
| P value                     | 0,0132                                         |
| P value summary             | ns                                             |
| One- or two-tailed P value? | One-tailed                                     |
| t, df                       | t=6,041, df=2                                  |
| Mean 2b5ho placebo          | 0,03433                                        |
| Mean 2b5ho GBZ10            | 0,02837                                        |
| 95% confidence interval     | -0,01020 to -0,001715                          |
| <b>Table Analyzed</b>       | <b>Ddit3 24h WT plac vs WT GBZ10</b>           |
| Unpaired t test             |                                                |
| P value                     | 0,2585                                         |
| P value summary             | ns                                             |
| One- or two-tailed P value? | One-tailed                                     |
| t, df                       | t=0,7800, df=2                                 |
| Mean WT placebo             | 0,01862                                        |
| Mean WT GBZ10               | 0,01788                                        |
| 95% confidence interval     | -0,004822 to 0,003342                          |
| <b>Table Analyzed</b>       | <b>Ddit3 24h 2b5 plac vs 2b5 GBZ10</b>         |
| Unpaired t test             |                                                |
| P value                     | 0,0293                                         |
| P value summary             | *                                              |
| One- or two-tailed P value? | One-tailed                                     |
| t, df                       | t=3,946, df=2                                  |
| Mean 2b5ho placebo          | 0,03492                                        |
| Mean 2b5ho GBZ10            | 0,02526                                        |
| 95% confidence interval     | -0,02018 to 0,0008721                          |
| <b>Table Analyzed</b>       | <b>Trib3 4h WT plac vs WT GBZ10</b>            |
| Unpaired t test             |                                                |
| P value                     | 0,1227                                         |
| P value summary             | ns                                             |
| One- or two-tailed P value? | One-tailed                                     |
| t, df                       | t=1,626, df=2                                  |
| Mean WT placebo             | 0,00625                                        |
| Mean WT GBZ10               | 0,007055                                       |
| 95% confidence interval     | -0,001325 to 0,002935                          |
| <b>Table Analyzed</b>       | <b>Trib3 4h 2b5 plac vs 2b5 GBZ10</b>          |
| Unpaired t test             |                                                |
| P value                     | 0,1106                                         |
| P value summary             | ns                                             |
| One- or two-tailed P value? | One-tailed                                     |
| t, df                       | t=1,756, df=2                                  |
| Mean 2b5ho placebo          | 0,07922                                        |
| Mean 2b5ho GBZ10            | 0,06332                                        |
| 95% confidence interval     | -0,05485 to 0,02306                            |
| <b>Table Analyzed</b>       | <b>Trib3 24h WT plac vs WT GBZ10</b>           |
| Unpaired t test             |                                                |
| P value                     | 0,4836                                         |
| P value summary             | ns                                             |
| One- or two-tailed P value? | One-tailed                                     |
| t, df                       | t=0,04640, df=2                                |
| Mean WT placebo             | 0,005235                                       |
| Mean WT GBZ10               | 0,00517                                        |
| 95% confidence interval     | -0,006093 to 0,005963                          |
| <b>Table Analyzed</b>       | <b>Trib3 24h 2b5 plac vs 2b5 GBZ10</b>         |
| Unpaired t test             |                                                |
| P value                     | 0,0051                                         |
| P value summary             | **                                             |
| One- or two-tailed P value? | One-tailed                                     |
| t, df                       | t=9,853, df=2                                  |
| Mean 2b5ho placebo          | 0,05951                                        |
| Mean 2b5ho GBZ10            | 0,03938                                        |
| 95% confidence interval     | -0,02891 to -0,01134                           |

|                             |                                      |
|-----------------------------|--------------------------------------|
| <b>Table Analyzed</b>       | <b>Gadd34 4h WT plac vs WT GBZ10</b> |
| Unpaired t test             | 0,01                                 |
| P value                     | *                                    |
| P value summary             | *                                    |
| One- or two-tailed P value? | One-tailed                           |
| t, df                       | t=-6,960, df=2                       |
| Mean WT placebo             | 0,02111                              |
| Mean WT GBZ10               | 0,02955                              |
| 95% confidence interval     | 0,003222 to 0,01366                  |

|                             |                                        |
|-----------------------------|----------------------------------------|
| <b>Table Analyzed</b>       | <b>Gadd34 4h 2b5 plac vs 2b5 GBZ10</b> |
| Unpaired t test             | 0,0339                                 |
| P value                     | *                                      |
| P value summary             | *                                      |
| One- or two-tailed P value? | One-tailed                             |
| t, df                       | t=3,642, df=2                          |
| Mean 2b5ho placebo          | 0,0263                                 |
| Mean 2b5ho GBZ10            | 0,0337                                 |
| 95% confidence interval     | -0,001342 to 0,01615                   |

|                             |                                       |
|-----------------------------|---------------------------------------|
| <b>Table Analyzed</b>       | <b>Gadd34 24h WT plac vs WT GBZ10</b> |
| Unpaired t test             | 0,3501                                |
| P value                     | ns                                    |
| P value summary             | ns                                    |
| One- or two-tailed P value? | One-tailed                            |
| t, df                       | t=-0,4446, df=2                       |
| Mean WT placebo             | 0,0181                                |
| Mean WT GBZ10               | 0,01726                               |
| 95% confidence interval     | -0,009023 to 0,007333                 |

|                             |                                         |
|-----------------------------|-----------------------------------------|
| <b>Table Analyzed</b>       | <b>Gadd34 24h 2b5 plac vs 2b5 GBZ10</b> |
| Unpaired t test             | 0,0834                                  |
| P value                     | ns                                      |
| P value summary             | ns                                      |
| One- or two-tailed P value? | One-tailed                              |
| t, df                       | t=2,131, df=2                           |
| Mean 2b5ho placebo          | 0,02419                                 |
| Mean 2b5ho GBZ10            | 0,02625                                 |
| 95% confidence interval     | -0,002110 to 0,006250                   |

## Figure 2

---

| Table Analyzed                | p-eIF2 $\alpha$ /eIF2 $\alpha$ 4h placebo vs S1                             |
|-------------------------------|-----------------------------------------------------------------------------|
| Unpaired t test               |                                                                             |
| P value                       | 0,0569                                                                      |
| P value summary               | ns                                                                          |
| One- or two-tailed P value?   | One-tailed                                                                  |
| t, df                         | t=1,913, df=5                                                               |
| Mean of placebo               | 0,07091                                                                     |
| Mean of S1 4,5                | 0,04179                                                                     |
| 95% confidence interval       | -0,06824 to 0,01000                                                         |
| <b>Table Analyzed</b>         | <b>p-eIF2<math>\alpha</math>/eIF2<math>\alpha</math> 4h plac vs GBZ4,5</b>  |
| Unpaired t test               |                                                                             |
| P value                       | 0,0725                                                                      |
| P value summary               | ns                                                                          |
| One- or two-tailed P value?   | One-tailed                                                                  |
| t, df                         | t=1,725, df=5                                                               |
| Mean of placebo               | 0,07091                                                                     |
| Mean of GBZ 4,5               | 0,04773                                                                     |
| 95% confidence interval       | -0,05771 to 0,01136                                                         |
| <b>Table Analyzed</b>         | <b>p-eIF2<math>\alpha</math>/eIF2<math>\alpha</math> 4h plac vs GBZ10</b>   |
| Unpaired t test               |                                                                             |
| P value                       | 0,0391                                                                      |
| P value summary               | *                                                                           |
| One- or two-tailed P value?   | One-tailed                                                                  |
| t, df                         | t=2,354, df=4                                                               |
| Mean of placebo               | 0,07091                                                                     |
| Mean of GBZ 10                | 0,03487                                                                     |
| 95% confidence interval       | -0,07853 to 0,006459                                                        |
| <b>Table Analyzed</b>         | <b>p-eIF2<math>\alpha</math>/eIF2<math>\alpha</math> 24h plac vs S1</b>     |
| Mann Whitney test             |                                                                             |
| P value                       | 0,5                                                                         |
| Exact or approximate P value? | Exact                                                                       |
| P value summary               | ns                                                                          |
| One- or two-tailed P value?   | One-tailed                                                                  |
| Sum of ranks in column A,B    | 12 , 16                                                                     |
| Mann-Whitney U                | 6                                                                           |
| Median of placebo             | 0,05321, n=3                                                                |
| Median of S1 4,5              | 0,04328, n=4                                                                |
| Difference: Actual            | -0,009931                                                                   |
| Difference: Hodges-Lehmann    | -0,00393                                                                    |
| <b>Table Analyzed</b>         | <b>p-eIF2<math>\alpha</math>/eIF2<math>\alpha</math> 24h plac vs GBZ4,5</b> |
| Unpaired t test               |                                                                             |
| P value                       | 0,1794                                                                      |
| P value summary               | ns                                                                          |
| One- or two-tailed P value?   | One-tailed                                                                  |
| t, df                         | t=1,010, df=5                                                               |
| Mean of placebo               | 0,05421                                                                     |
| Mean of GBZ 4,5               | 0,04648                                                                     |
| 95% confidence interval       | -0,02740 to 0,01194                                                         |
| <b>Table Analyzed</b>         | <b>p-eIF2<math>\alpha</math>/eIF2<math>\alpha</math> 24h plac vs GBZ10</b>  |
| Unpaired t test               |                                                                             |
| P value                       | 0,2069                                                                      |
| P value summary               | ns                                                                          |
| One- or two-tailed P value?   | One-tailed                                                                  |
| t, df                         | t=0,8910, df=5                                                              |
| Mean of placebo               | 0,05421                                                                     |
| Mean of GBZ 10                | 0,04637                                                                     |
| 95% confidence interval       | -0,03046 to 0,01478                                                         |

**Figure 4, A**

|                                         |  |                                            |  |                     |  |                         |  |                                           |  |
|-----------------------------------------|--|--------------------------------------------|--|---------------------|--|-------------------------|--|-------------------------------------------|--|
| Two-way RM ANOVA                        |  | Matching: Stacked                          |  |                     |  |                         |  |                                           |  |
| Alpha                                   |  | 0,05                                       |  |                     |  |                         |  |                                           |  |
| <b>Table Analyzed</b>                   |  | <b>WT plac vs VWM placebo body weight</b>  |  |                     |  | WT: n=8                 |  | VWM: n=16                                 |  |
| Source of Variation                     |  | % of total variation                       |  | P value             |  | P value summary         |  | Significant? Geisser-Greenhouse's epsilon |  |
| Time x Genotype                         |  | 2,417                                      |  | <0,0001             |  | ****                    |  | Yes                                       |  |
| Time                                    |  | 4,867                                      |  | <0,0001             |  | ****                    |  | Yes 0,2083                                |  |
| Genotype                                |  | 84,45                                      |  | <0,0001             |  | ****                    |  | Yes                                       |  |
| Subject                                 |  | 9,008                                      |  | <0,0001             |  | ****                    |  | Yes                                       |  |
| Two-way RM ANOVA                        |  | Matching: Stacked                          |  |                     |  |                         |  |                                           |  |
| Alpha                                   |  | 0,05                                       |  |                     |  |                         |  |                                           |  |
| <b>Table Analyzed</b>                   |  | <b>WT body weight - treatment vs plac</b>  |  |                     |  |                         |  |                                           |  |
| Source of Variation                     |  | % of total variation                       |  | P value             |  | P value summary         |  | Significant?                              |  |
| Time x Treatment                        |  | 4,39                                       |  | <0,0001             |  | ****                    |  | Yes                                       |  |
| Time                                    |  | 32,68                                      |  | <0,0001             |  | ****                    |  | Yes                                       |  |
| Treatment                               |  | 27,45                                      |  | 0,0004              |  | ***                     |  | Yes                                       |  |
| Subject                                 |  | 30,42                                      |  | <0,0001             |  | ****                    |  | Yes                                       |  |
| Dunnnett's multiple comparisons test    |  | Mean Diff,                                 |  | 95,00% CI of diff,  |  | Significant?            |  | Summary Adjusted P Value                  |  |
| Placebo-WT vs. Guanabenz 4.5-WT         |  | 3,594                                      |  | 1,760 to 5,428      |  | Yes                     |  | *** 0,0001                                |  |
| Placebo-WT vs. Sefhin1-WT               |  | 1,128                                      |  | -0,7061 to 2,962    |  | No                      |  | ns 0,3101                                 |  |
| Placebo-WT vs. Guanabenz 10-WT          |  | 1,15                                       |  | -0,6840 to 2,984    |  | No                      |  | ns 0,2957                                 |  |
| Test details                            |  | Mean 1                                     |  | Mean 2              |  | Mean Diff,              |  | SE of diff, N1 N2 q DF                    |  |
| Placebo-WT vs. Guanabenz 4.5-WT         |  | 25,74                                      |  | 22,14               |  | 3,594                   |  | 0,7385 176 176 4,866 28                   |  |
| Placebo-WT vs. Sefhin1-WT               |  | 25,74                                      |  | 24,61               |  | 1,128                   |  | 0,7385 176 176 1,527 28                   |  |
| Placebo-WT vs. Guanabenz 10-WT          |  | 25,74                                      |  | 24,59               |  | 1,15                    |  | 0,7385 176 176 1,557 28                   |  |
| Two-way RM ANOVA                        |  | Matching: Stacked                          |  |                     |  |                         |  |                                           |  |
| Alpha                                   |  | 0,05                                       |  |                     |  |                         |  |                                           |  |
| <b>Table Analyzed</b>                   |  | <b>VWM body weight - treatment vs plac</b> |  |                     |  |                         |  |                                           |  |
| Source of Variation                     |  | % of total variation                       |  | P value             |  | P value summary         |  | Significant?                              |  |
| Time x Treatment                        |  | 7,303                                      |  | <0,0001             |  | ****                    |  | Yes                                       |  |
| Time                                    |  | 17,57                                      |  | <0,0001             |  | ****                    |  | Yes                                       |  |
| Treatment                               |  | 10,98                                      |  | 0,0119              |  | *                       |  | Yes                                       |  |
| Subject                                 |  | 54,26                                      |  | <0,0001             |  | ****                    |  | Yes                                       |  |
| Dunnnett's multiple comparisons test    |  | Predicted (LS) mean diff,                  |  | 95,00% CI of diff,  |  | Significant?            |  | Summary Adjusted P Value                  |  |
| Placebo-2b42b5 vs. Guanabenz 4.5-2b42b5 |  | -0,7324                                    |  | -1,594 to 0,1292    |  | No                      |  | ns 0,1125                                 |  |
| Placebo-2b42b5 vs. Sefhin1-2b42b5       |  | 0,4364                                     |  | -0,4112 to 1,284    |  | No                      |  | ns 0,4653                                 |  |
| Placebo-2b42b5 vs. Guanabenz 10-2b42b5  |  | -0,381                                     |  | -1,229 to 0,4666    |  | No                      |  | ns 0,5703                                 |  |
| Test details                            |  | Predicted (LS) mean 1                      |  | Predicted (LS) mean |  | Predicted (LS) mean dif |  | SE of diff, N1 N2 q DF                    |  |
| Placebo-2b42b5 vs. Guanabenz 4.5-2b42b5 |  | 15,38                                      |  | 16,11               |  | -0,7324                 |  | 0,3572 352 330 2,051 59                   |  |
| Placebo-2b42b5 vs. Sefhin1-2b42b5       |  | 15,38                                      |  | 14,94               |  | 0,4364                  |  | 0,3514 352 352 1,242 59                   |  |
| Placebo-2b42b5 vs. Guanabenz 10-2b42b5  |  | 15,38                                      |  | 15,76               |  | -0,381                  |  | 0,3514 352 352 1,084 59                   |  |

**Figure 4, B**

|                                  |  |                 |  |              |  |                 |  |                               |  |
|----------------------------------|--|-----------------|--|--------------|--|-----------------|--|-------------------------------|--|
| Kruskal-Wallis test              |  | <0,0001         |  |              |  |                 |  |                               |  |
| P value                          |  | <0,0001         |  |              |  |                 |  |                               |  |
| Exact or approximate P value?    |  | Approximate     |  |              |  |                 |  |                               |  |
| P value summary                  |  | ****            |  |              |  |                 |  |                               |  |
| Number of groups                 |  | 4               |  |              |  |                 |  |                               |  |
| Kruskal-Wallis statistic         |  | 21,23           |  |              |  |                 |  |                               |  |
| Dunn's multiple comparisons test |  | Mean rank diff, |  | Significant? |  | Summary         |  | Adjusted P Valu A-?           |  |
| placebo vs. guanabenz (4.5mg/kg) |  | 18,33           |  | Yes          |  | **              |  | 0,0085 B guanabenz (4,5mg/kg) |  |
| placebo vs. guanabenz (10mg/kg)  |  | 10,75           |  | No           |  | ns              |  | 0,2251 C guanabenz (10mg/kg)  |  |
| placebo vs. sephin1              |  | -7,75           |  | No           |  | ns              |  | 0,5981 D sephin1              |  |
| Test details                     |  | Mean rank 1     |  | Mean rank 2  |  | Mean rank diff, |  | n1 n2 Z                       |  |
| placebo vs. guanabenz (4.5mg/kg) |  | 37,13           |  | 18,8         |  | 18,33           |  | 16 15 2,985                   |  |
| placebo vs. guanabenz (10mg/kg)  |  | 37,13           |  | 26,38        |  | 10,75           |  | 16 16 1,78                    |  |
| placebo vs. sephin1              |  | 37,13           |  | 44,88        |  | -7,75           |  | 16 16 1,283                   |  |

**Figure 4, C**

|                                         |  |                                   |  |                    |  |              |  |                                        |  |
|-----------------------------------------|--|-----------------------------------|--|--------------------|--|--------------|--|----------------------------------------|--|
| <b>Table Analyzed</b>                   |  | <b>WT-VWM placebo slips on BB</b> |  |                    |  |              |  |                                        |  |
| Unpaired t test with Welch's correction |  |                                   |  |                    |  |              |  |                                        |  |
| P value                                 |  | <0,0001                           |  |                    |  |              |  |                                        |  |
| P value summary                         |  | ****                              |  |                    |  |              |  |                                        |  |
| One- or two-tailed P value?             |  | One-tailed                        |  |                    |  |              |  |                                        |  |
| Welch-corrected t, df                   |  | t=6,788, df=15,63                 |  |                    |  |              |  |                                        |  |
| Mean WT placebo                         |  | 0,5                               |  |                    |  |              |  |                                        |  |
| Mean VWM placebo                        |  | 9,375                             |  |                    |  |              |  |                                        |  |
| 95% confidence interval                 |  | 6,098 to 11,65                    |  |                    |  |              |  |                                        |  |
| <b>Table Analyzed</b>                   |  | <b>WT treatment, slips on BB</b>  |  |                    |  |              |  |                                        |  |
| Kruskal-Wallis test                     |  | 0,1546                            |  |                    |  |              |  |                                        |  |
| P value                                 |  | 0,1546                            |  |                    |  |              |  |                                        |  |
| Exact or approximate P value?           |  | Approximate                       |  |                    |  |              |  |                                        |  |
| P value summary                         |  | ns                                |  |                    |  |              |  |                                        |  |
| Number of groups                        |  | 4                                 |  |                    |  |              |  |                                        |  |
| Kruskal-Wallis statistic                |  | 5,247                             |  |                    |  |              |  |                                        |  |
| Dunn's multiple comparisons test        |  | Mean rank diff,                   |  | Significant?       |  | Summary      |  | Adjusted P Valu A-?                    |  |
| placebo vs. sephin1                     |  | -0,625                            |  | No                 |  | ns           |  | >0,9999 B sephin1                      |  |
| placebo vs. Gbz 10 mg/kg                |  | 5,813                             |  | No                 |  | ns           |  | 0,3758 C Gbz 10 mg/kg                  |  |
| placebo vs. 2b4he2b5ho - gbz (d4.5)     |  | 5,813                             |  | No                 |  | ns           |  | 0,3758 D 2b4he2b5ho - gbz (d4.5)       |  |
| <b>Table Analyzed</b>                   |  | <b>VWM treatment, slips on BB</b> |  |                    |  |              |  |                                        |  |
| Welch's ANOVA test                      |  |                                   |  |                    |  |              |  |                                        |  |
| W (DFn, DFd)                            |  | 31,78 (3,000, 25,91)              |  |                    |  |              |  |                                        |  |
| P value                                 |  | <0,0001                           |  |                    |  |              |  |                                        |  |
| P value summary                         |  | ****                              |  |                    |  |              |  |                                        |  |
| Dunnnett's T3 multiple comparisons test |  | Mean Diff,                        |  | 95,00% CI of diff, |  | Significant? |  | Summary Adjusted P Value A-?           |  |
| placebo vs. sephin1                     |  | -1,492                            |  | -7,076 to 4,092    |  | No           |  | ns 0,833 B sephin1                     |  |
| placebo vs. Gbz 10 mg/kg                |  | 6                                 |  | 1,728 to 10,27     |  | Yes          |  | ** 0,0015 C Gbz 10 mg/kg               |  |
| placebo vs. 2b4he2b5ho - gbz (d4.5)     |  | 8,775                             |  | 4,862 to 12,69     |  | Yes          |  | **** <0,0001 D 2b4he2b5ho - gbz (d4.5) |  |
| Test details                            |  | Mean 1                            |  | Mean 2             |  | Mean Diff,   |  | SE of diff, n1 n2 t DF                 |  |
| placebo vs. sephin1                     |  | 9,375                             |  | 10,87              |  | -1,492       |  | 1,973 16 15 0,7561 28,1                |  |
| placebo vs. Gbz 10 mg/kg                |  | 9,375                             |  | 3,375              |  | 6            |  | 1,491 16 16 4,024 23,9                 |  |
| placebo vs. 2b4he2b5ho - gbz (d4.5)     |  | 9,375                             |  | 0,6                |  | 8,775        |  | 1,308 16 15 6,71 15,7                  |  |

**Figure 5**

| Table Analyzed                      |                  | WT-VWM placebo              |              |                  |                  |    |       |    |  |  |  |
|-------------------------------------|------------------|-----------------------------|--------------|------------------|------------------|----|-------|----|--|--|--|
| Nested t test                       |                  |                             |              |                  |                  |    |       |    |  |  |  |
| P value                             | 0,0003           |                             |              |                  |                  |    |       |    |  |  |  |
| P value summary                     | ***              |                             |              |                  |                  |    |       |    |  |  |  |
| One- or two-tailed P value?         | Two-tailed       |                             |              |                  |                  |    |       |    |  |  |  |
| t, df                               | t=8,958, df=5    |                             |              |                  |                  |    |       |    |  |  |  |
| F, DFn, Dfd                         | 80,24, 1, 5      |                             |              |                  |                  |    |       |    |  |  |  |
| Mean of WT                          | 10,4             |                             |              |                  |                  |    |       |    |  |  |  |
| Mean of VWM                         | 37,45            |                             |              |                  |                  |    |       |    |  |  |  |
| 95% confidence interval             | -34,81 to -19,29 |                             |              |                  |                  |    |       |    |  |  |  |
| Random effects                      | SD               |                             | Variance     |                  |                  |    |       |    |  |  |  |
| Variation within subcolumns         | 6,428            |                             | 41,32        |                  |                  |    |       |    |  |  |  |
| Variation among subcolumn means     | 2,002            |                             | 4,008        |                  |                  |    |       |    |  |  |  |
| <b>Table Analyzed</b>               |                  | <b>WT treatment effect</b>  |              |                  |                  |    |       |    |  |  |  |
| ANOVA summary                       |                  |                             |              |                  |                  |    |       |    |  |  |  |
| F                                   | 3,881            |                             |              |                  |                  |    |       |    |  |  |  |
| P value                             | 0,1474           |                             |              |                  |                  |    |       |    |  |  |  |
| P value summary                     | ns               |                             |              |                  |                  |    |       |    |  |  |  |
| ANOVA table                         | SS               | DF                          | MS           | F (DFn, DFd)     | P value          |    |       |    |  |  |  |
| Treatment (between columns)         | 55,22            | 3                           | 18,41        | F (3, 3) = 3,881 | P=0,1474         |    |       |    |  |  |  |
| Residual (within columns)           | 14,23            | 3                           | 4,743        |                  |                  |    |       |    |  |  |  |
| Total                               | 69,45            | 6                           |              |                  |                  |    |       |    |  |  |  |
| <b>Table Analyzed</b>               |                  | <b>VWM treatment effect</b> |              |                  |                  |    |       |    |  |  |  |
| Nested one-way ANOVA                |                  |                             |              |                  |                  |    |       |    |  |  |  |
| P value                             | 0,0056           |                             |              |                  |                  |    |       |    |  |  |  |
| P value summary                     | **               |                             |              |                  |                  |    |       |    |  |  |  |
| F, DFn, Dfd                         | 7,349, 3, 11     |                             |              |                  |                  |    |       |    |  |  |  |
| Random effects                      | SD               |                             | Variance     |                  |                  |    |       |    |  |  |  |
| Variation within subcolumns         | 7,074            |                             | 50,04        |                  |                  |    |       |    |  |  |  |
| Variation among subcolumn means     | 1,933            |                             | 3,737        |                  |                  |    |       |    |  |  |  |
| Dunnett's multiple comparisons test | Mean Diff,       | 95,00% CI of diff,          | Significant? | Summary          | Adjusted P Value |    |       |    |  |  |  |
| placebo vs. S1                      | -3,804           | -12,17 to 4,565             | No           | ns               | 0,5057           |    |       |    |  |  |  |
| placebo vs. GBZ W10                 | -2,426           | -8,956 to 4,103             | No           | ns               | 0,6483           |    |       |    |  |  |  |
| placebo vs. GBZ D4.5                | 8,617            | 1,530 to 15,70              | Yes          | *                | 0,0179           |    |       |    |  |  |  |
| Test details                        | Mean 1           | Mean 2                      | Mean Diff,   | SE of diff,      | N1               | N2 | q     | DF |  |  |  |
| placebo vs. S1                      | 37,42            | 41,23                       | -3,804       | 3,046            | 27               | 10 | 1,249 | 11 |  |  |  |
| placebo vs. GBZ W10                 | 37,42            | 39,85                       | -2,426       | 2,377            | 27               | 24 | 1,021 | 11 |  |  |  |
| placebo vs. GBZ D4.5                | 37,42            | 28,8                        | 8,617        | 2,58             | 27               | 18 | 3,34  | 11 |  |  |  |

**Figure 6**

| Table Analyzed                      |               | WT VWM placebo -weighed mean            |                  |                   |                  |     |          |    |
|-------------------------------------|---------------|-----------------------------------------|------------------|-------------------|------------------|-----|----------|----|
| Unpaired t test                     |               |                                         |                  |                   |                  |     |          |    |
| P value                             | 0,0009        |                                         |                  |                   |                  |     |          |    |
| P value summary                     | ***           |                                         |                  |                   |                  |     |          |    |
| One- or two-tailed P value?         | Two-tailed    |                                         |                  |                   |                  |     |          |    |
| t, df                               | t=6,028, df=6 |                                         |                  |                   |                  |     |          |    |
| Table Analyzed                      |               | WT (caudal&cranial) ratio               |                  |                   |                  |     |          |    |
| ANOVA summary                       |               |                                         |                  |                   |                  |     |          |    |
| F                                   | 0,6863        |                                         |                  |                   |                  |     |          |    |
| P value                             | 0,5852        |                                         |                  |                   |                  |     |          |    |
| P value summary                     | ns            |                                         |                  |                   |                  |     |          |    |
| ANOVA table                         | SS            | DF                                      | MS               | F (DFn, DFd)      | P value          |     |          |    |
| Treatment (between columns)         | 3,82          | 3                                       | 1,273            | F (3, 8) = 0,6863 | P=0,5852         |     |          |    |
| Residual (within columns)           | 14,84         | 8                                       | 1,855            |                   |                  |     |          |    |
| Total                               | 18,66         | 11                                      |                  |                   |                  |     |          |    |
| Table Analyzed                      |               | VWM (caudal&cranial) ratio weighed mean |                  |                   |                  |     |          |    |
| ANOVA summary                       |               |                                         |                  |                   |                  |     |          |    |
| F                                   | 2,44          |                                         |                  |                   |                  |     |          |    |
| P value                             | 0,1021        |                                         |                  |                   |                  |     |          |    |
| P value summary                     | ns            |                                         |                  |                   |                  |     |          |    |
| ANOVA table                         | SS            | DF                                      | MS               | F (DFn, DFd)      | P value          |     |          |    |
| Treatment (between columns)         | 882,5         | 3                                       | 294,2            | F (3, 16) = 2,44  | P=0,1021         |     |          |    |
| Residual (within columns)           | 1929          | 16                                      | 120,6            |                   |                  |     |          |    |
| Total                               | 2812          | 19                                      |                  |                   |                  |     |          |    |
| Table Analyzed                      |               | VWM- cranial weighed average            |                  |                   |                  |     |          |    |
| Data sets analyzed                  | A-D           |                                         |                  |                   |                  |     |          |    |
| ANOVA summary                       |               |                                         |                  |                   |                  |     |          |    |
| F                                   | 1,459         |                                         |                  |                   |                  |     |          |    |
| P value                             | 0,263         |                                         |                  |                   |                  |     |          |    |
| P value summary                     | ns            |                                         |                  |                   |                  |     |          |    |
| ANOVA table                         | SS            | DF                                      | MS               | F (DFn, DFd)      | P value          |     |          |    |
| Treatment (between columns)         | 478,9         | 3                                       | 159,6            | F (3, 16) = 1,459 | P=0,2630         |     |          |    |
| Residual (within columns)           | 1750          | 16                                      | 109,4            |                   |                  |     |          |    |
| Total                               | 2229          | 19                                      |                  |                   |                  |     |          |    |
| Table Analyzed                      |               | VWM- caudal weighed average             |                  |                   |                  |     |          |    |
| ANOVA summary                       |               |                                         |                  |                   |                  |     |          |    |
| F                                   | 3,439         |                                         |                  |                   |                  |     |          |    |
| P value                             | 0,0421        |                                         |                  |                   |                  |     |          |    |
| P value summary                     | *             |                                         |                  |                   |                  |     |          |    |
| Dunnett's multiple comparisons test | Mean Diff,    | 95,00% CI of diff,                      | Below threshold? | Summary           | Adjusted P Value | A-? |          |    |
| placebo vs. GBZ D4.5                | 24,73         | 2,405 to 47,06                          | Yes              | *                 | 0,0288           | B   | GBZ D4.5 |    |
| placebo vs. GBZ W10                 | 17,11         | -5,217 to 39,43                         | No               | ns                | 0,1535           | C   | GBZ W10  |    |
| placebo vs. S1 D4.5                 | 4,87          | -17,46 to 27,20                         | No               | ns                | 0,8956           | D   | S1 D4.5  |    |
| Test details                        | Mean 1        | Mean 2                                  | Mean Diff,       | SE of diff,       | n1               | n2  | q        | DF |
| placebo vs. GBZ D4.5                | 45,53         | 20,8                                    | 24,73            | 8,611             | 5                | 5   | 2,872    | 16 |
| placebo vs. GBZ W10                 | 45,53         | 28,43                                   | 17,11            | 8,611             | 5                | 5   | 1,987    | 16 |
| placebo vs. S1 D4.5                 | 45,53         | 40,66                                   | 4,87             | 8,611             | 5                | 5   | 0,5655   | 16 |
| ANOVA table                         | SS            | DF                                      | MS               | F (DFn, DFd)      | P value          |     |          |    |
| Treatment (between columns)         | 1913          | 3                                       | 637,6            | F (3, 16) = 3,439 | P=0,0421         |     |          |    |
| Residual (within columns)           | 2966          | 16                                      | 185,4            |                   |                  |     |          |    |
| Total                               | 4879          | 19                                      |                  |                   |                  |     |          |    |
| Table Analyzed                      |               | WT - cranial weighed average            |                  |                   |                  |     |          |    |
| ANOVA summary                       |               |                                         |                  |                   |                  |     |          |    |
| F                                   | 1,148         |                                         |                  |                   |                  |     |          |    |
| P value                             | 0,3872        |                                         |                  |                   |                  |     |          |    |
| P value summary                     | ns            |                                         |                  |                   |                  |     |          |    |
| Dunnett's multiple comparisons test | Mean Diff,    | 95,00% CI of diff,                      | Below threshold? | Summary           | Adjusted P Value | A-? |          |    |
| placebo vs. GBZ D4.5                | -0,52         | -4,101 to 3,061                         | No               | ns                | 0,9517           | B   | GBZ D4.5 |    |
| placebo vs. GBZ W10                 | -0,6867       | -4,268 to 2,895                         | No               | ns                | 0,9009           | C   | GBZ W10  |    |
| placebo vs. S1 D4.5                 | -2,193        | -5,775 to 1,388                         | No               | ns                | 0,2551           | D   | S1 D4.5  |    |
| Test details                        | Mean 1        | Mean 2                                  | Mean Diff,       | SE of diff,       | n1               | n2  | q        | DF |
| placebo vs. GBZ D4.5                | 0,7133        | 1,233                                   | -0,52            | 1,244             | 3                | 3   | 0,4181   | 8  |
| placebo vs. GBZ W10                 | 0,7133        | 1,4                                     | -0,6867          | 1,244             | 3                | 3   | 0,5522   | 8  |
| placebo vs. S1 D4.5                 | 0,7133        | 2,907                                   | -2,193           | 1,244             | 3                | 3   | 1,764    | 8  |
| ANOVA table                         | SS            | DF                                      | MS               | F (DFn, DFd)      | P value          |     |          |    |
| Treatment (between columns)         | 7,988         | 3                                       | 2,663            | F (3, 8) = 1,148  | P=0,3872         |     |          |    |
| Residual (within columns)           | 18,56         | 8                                       | 2,32             |                   |                  |     |          |    |
| Total                               | 26,55         | 11                                      |                  |                   |                  |     |          |    |
| Table Analyzed                      |               | WT - caudal weighed average             |                  |                   |                  |     |          |    |
| ANOVA summary                       |               |                                         |                  |                   |                  |     |          |    |
| F                                   | 0,481         |                                         |                  |                   |                  |     |          |    |
| P value                             | 0,7045        |                                         |                  |                   |                  |     |          |    |
| P value summary                     | ns            |                                         |                  |                   |                  |     |          |    |
| Dunnett's multiple comparisons test | Mean Diff,    | 95,00% CI of diff,                      | Below threshold? | Summary           | Adjusted P Value | A-? |          |    |
| placebo vs. GBZ D4.5                | -0,34         | -4,774 to 4,094                         | No               | ns                | 0,992            | B   | GBZ D4.5 |    |
| placebo vs. GBZ W10                 | -1,71         | -6,144 to 2,724                         | No               | ns                | 0,5753           | C   | GBZ W10  |    |
| placebo vs. S1 D4.5                 | -0,9933       | -5,428 to 3,441                         | No               | ns                | 0,8559           | D   | S1 D4.5  |    |
| Test details                        | Mean 1        | Mean 2                                  | Mean Diff,       | SE of diff,       | n1               | n2  | q        | DF |
| placebo vs. GBZ D4.5                | 1,527         | 1,867                                   | -0,34            | 1,54              | 3                | 3   | 0,2208   | 8  |
| placebo vs. GBZ W10                 | 1,527         | 3,237                                   | -1,71            | 1,54              | 3                | 3   | 1,11     | 8  |
| placebo vs. S1 D4.5                 | 1,527         | 2,52                                    | -0,9933          | 1,54              | 3                | 3   | 0,6451   | 8  |
| ANOVA table                         | SS            | DF                                      | MS               | F (DFn, DFd)      | P value          |     |          |    |
| Treatment (between columns)         | 5,133         | 3                                       | 1,711            | F (3, 8) = 0,481  | P=0,7045         |     |          |    |
| Residual (within columns)           | 28,45         | 8                                       | 3,557            |                   |                  |     |          |    |
| Total                               | 33,59         | 11                                      |                  |                   |                  |     |          |    |

**Figure 8**

| Table Analyzed                       |                  | Genotype-plc Ratio p-eIF2a         |                  |                  |                  |       |                 |  |
|--------------------------------------|------------------|------------------------------------|------------------|------------------|------------------|-------|-----------------|--|
| Mann Whitney test                    |                  |                                    |                  |                  |                  |       |                 |  |
| P value                              | 0,0357           |                                    |                  |                  |                  |       |                 |  |
| Exact or approximate P value?        | Exact            |                                    |                  |                  |                  |       |                 |  |
| P value summary                      | *                |                                    |                  |                  |                  |       |                 |  |
| One- or two-tailed P value?          | One-tailed       |                                    |                  |                  |                  |       |                 |  |
| Sum of ranks in column A,B           | 15, 21           |                                    |                  |                  |                  |       |                 |  |
| Mann-Whitney U                       | 0                |                                    |                  |                  |                  |       |                 |  |
| Difference between medians           |                  |                                    |                  |                  |                  |       |                 |  |
| Median of WT                         | 0,06963, n=2     |                                    |                  |                  |                  |       |                 |  |
| Median of VWM                        | 0,02852, n=6     |                                    |                  |                  |                  |       |                 |  |
| Difference: Actual                   | -0,04311         |                                    |                  |                  |                  |       |                 |  |
| Difference: Hodges-Lehmann           | -0,04268         |                                    |                  |                  |                  |       |                 |  |
| Table Analyzed                       |                  | WT treatment effect Ratio p-eIF2a  |                  |                  |                  |       |                 |  |
| ANOVA summary                        |                  |                                    |                  |                  |                  |       |                 |  |
| F                                    | 6,306            |                                    |                  |                  |                  |       |                 |  |
| P value                              | 0,0375           |                                    |                  |                  |                  |       |                 |  |
| P value summary                      | *                |                                    |                  |                  |                  |       |                 |  |
| Dunnnett's multiple comparisons test | Mean Diff.       | 95,00% CI of diff.                 | Below threshold? | Summary          | Adjusted P Value | A-?   |                 |  |
| Plc vs. dGBZ4.5                      | 0,01967          | -0,008833 to 0,04817               | No               | ns               | 0,1581           | B     | dGBZ4.5         |  |
| Plc vs. wGBZ10                       | 0,02435          | -0,004155 to 0,05285               | No               | ns               | 0,0847           | C     | wGBZ10          |  |
| Plc vs. S1                           | -0,004856        | -0,03087 to 0,02116                | No               | ns               | 0,8681           | D     | S1              |  |
| Test details                         | Mean 1           | Mean 2                             | Mean Diff.       | SE of diff.      | n1               | n2    | q               |  |
| Plc vs. dGBZ4.5                      | 0,06963          | 0,04996                            | 0,01967          | 0,008695         | 2                | 2     | 2,262           |  |
| Plc vs. wGBZ10                       | 0,06963          | 0,04528                            | 0,02435          | 0,008695         | 2                | 2     | 2,8             |  |
| Plc vs. S1                           | 0,06963          | 0,07448                            | -0,004856        | 0,007937         | 2                | 3     | 0,6118          |  |
| ANOVA table                          | SS               | DF                                 | MS               | F (DFn, DFd)     | P value          |       |                 |  |
| Treatment (between columns)          | 0,00143          | 3                                  | 0,0004768        | F (3, 5) = 6,306 | P=0,0375         |       |                 |  |
| Residual (within columns)            | 0,000378         | 5                                  | 7,56E-05         |                  |                  |       |                 |  |
| Total                                | 0,001808         | 8                                  |                  |                  |                  |       |                 |  |
| Table Analyzed                       |                  | VWM treatment effect ratio p-eIF2a |                  |                  |                  |       |                 |  |
| Kruskal-Wallis test                  |                  |                                    |                  |                  |                  |       |                 |  |
| P value                              | 0,0207           |                                    |                  |                  |                  |       |                 |  |
| Exact or approximate P value?        | Approximate      |                                    |                  |                  |                  |       |                 |  |
| P value summary                      | *                |                                    |                  |                  |                  |       |                 |  |
| Number of groups                     | 4                |                                    |                  |                  |                  |       |                 |  |
| Kruskal-Wallis statistic             | 9,762            |                                    |                  |                  |                  |       |                 |  |
| Dunn's multiple comparisons test     | Mean rank diff.  | Significant?                       | Summary          | Adjusted P Value | A-?              |       |                 |  |
| Plc vs. dGBZ4.5                      | 9,833            | Yes                                | *                | 0,0361           | B                |       | dGBZ4.5         |  |
| Plc vs. wGBZ10                       | 9                | No                                 | ns               | 0,0646           | C                |       | wGBZ10          |  |
| Plc vs. S1                           | 11,13            | Yes                                | *                | 0,0201           | D                |       | S1              |  |
| Test details                         | Mean rank 1      | Mean rank 2                        | Mean rank diff.  | n1               | n2               | Z     |                 |  |
| Plc vs. dGBZ4.5                      | 19,33            | 9,5                                | 9,833            | 6                | 6                | 2,511 |                 |  |
| Plc vs. wGBZ10                       | 19,33            | 10,33                              | 9                | 6                | 6                | 2,298 |                 |  |
| Plc vs. S1                           | 19,33            | 8,2                                | 11,13            | 6                | 5                | 2,711 |                 |  |
| Table Analyzed                       |                  | WT-VWM placebo Ddit3               |                  |                  |                  |       |                 |  |
| Unpaired t test                      |                  |                                    |                  |                  |                  |       |                 |  |
| P value                              | <0,0001          |                                    |                  |                  |                  |       |                 |  |
| P value summary                      | ****             |                                    |                  |                  |                  |       |                 |  |
| Significantly different (P < 0.05)?  | Yes              |                                    |                  |                  |                  |       |                 |  |
| One- or two-tailed P value?          | One-tailed       |                                    |                  |                  |                  |       |                 |  |
| t, df                                | t=9,345, df=6    |                                    |                  |                  |                  |       |                 |  |
| Mean WT                              | 0,06455          |                                    |                  |                  |                  |       |                 |  |
| Mean VWM                             | 0,2682           |                                    |                  |                  |                  |       |                 |  |
| 95% confidence interval              | 0,1503 to 0,2570 |                                    |                  |                  |                  |       |                 |  |
| Table Analyzed                       |                  | WT treatment effects Ddit3         |                  |                  |                  |       |                 |  |
| ANOVA summary                        |                  |                                    |                  |                  |                  |       |                 |  |
| F                                    | 0,7992           |                                    |                  |                  |                  |       |                 |  |
| P value                              | 0,5452           |                                    |                  |                  |                  |       |                 |  |
| P value summary                      | ns               |                                    |                  |                  |                  |       |                 |  |
| ANOVA table                          | SS               | DF                                 |                  |                  |                  |       |                 |  |
| Treatment (between columns)          | 0,00008096       | 3                                  |                  |                  |                  |       |                 |  |
| Residual (within columns)            | 0,0001688        | 5                                  |                  |                  |                  |       |                 |  |
| Total                                | 0,0002498        | 8                                  |                  |                  |                  |       |                 |  |
| Table Analyzed                       |                  | VWM treatment effects Ddit3        |                  |                  |                  |       |                 |  |
| ANOVA summary                        |                  |                                    |                  |                  |                  |       |                 |  |
| F                                    | 5,461            |                                    |                  |                  |                  |       |                 |  |
| P value                              | 0,0076           |                                    |                  |                  |                  |       |                 |  |
| P value summary                      | **               |                                    |                  |                  |                  |       |                 |  |
| ANOVA table                          | SS               | DF                                 | Significant?     | Summary          | Adjusted P Value | A-?   |                 |  |
| Treatment (between columns)          | 0,02498          | 3                                  | No               | ns               | 0,9999           | B     | Seph1 4,5 mg/kg |  |
| Residual (within columns)            | 0,02744          | 18                                 | Yes              | **               | 0,0098           | C     | Gbz 10 mg/kg    |  |
| Total                                | 0,05242          | 21                                 | Yes              | *                | 0,0458           | D     | Gbz 4,5 mg/kg   |  |
| Dunnnett's multiple comparisons test | Mean Diff.       | 95,00% CI of diff.                 | 0,001583         | 0,0252           | 6                | 4     | 0,06282         |  |
| Placebo vs. Seph1 4,5 mg/kg          | 0,001583         | -0,06322 to 0,06639                | 0,07542          | 0,02254          | 6                | 6     | 3,346           |  |
| Placebo vs. Gbz 10 mg/kg             | 0,07542          | 0,01745 to 0,1334                  | 0,05895          | 0,02254          | 6                | 6     | 2,615           |  |
| Placebo vs. Gbz 4,5 mg/kg            | 0,05895          | 0,0009859 to 0,1169                |                  |                  |                  |       | 18              |  |
| Test details                         | Mean 1           | Mean 2                             |                  |                  |                  |       |                 |  |
| Placebo vs. Seph1 4,5 mg/kg          | 0,2682           | 0,2686                             |                  |                  |                  |       |                 |  |
| Placebo vs. Gbz 10 mg/kg             | 0,2682           | 0,1928                             |                  |                  |                  |       |                 |  |
| Placebo vs. Gbz 4,5 mg/kg            | 0,2682           | 0,2092                             |                  |                  |                  |       |                 |  |
| Table Analyzed                       |                  | WT-VWM placebo Trib3               |                  |                  |                  |       |                 |  |
| Unpaired t test                      |                  |                                    |                  |                  |                  |       |                 |  |
| P value                              | <0,0001          |                                    |                  |                  |                  |       |                 |  |
| P value summary                      | ****             |                                    |                  |                  |                  |       |                 |  |
| One- or two-tailed P value?          | One-tailed       |                                    |                  |                  |                  |       |                 |  |
| t, df                                | t=13,18, df=6    |                                    |                  |                  |                  |       |                 |  |
| Mean WT                              | 0,0092           |                                    |                  |                  |                  |       |                 |  |
| Mean VWM                             | 0,3998           |                                    |                  |                  |                  |       |                 |  |
| 95% confidence interval              | 0,3181 to 0,4630 |                                    |                  |                  |                  |       |                 |  |
| Table Analyzed                       |                  | WT treatment effects Trib3         |                  |                  |                  |       |                 |  |
| ANOVA summary                        |                  |                                    |                  |                  |                  |       |                 |  |
| F                                    | 0,9784           |                                    |                  |                  |                  |       |                 |  |
| P value                              | 0,4727           |                                    |                  |                  |                  |       |                 |  |
| P value summary                      | ns               |                                    |                  |                  |                  |       |                 |  |
| ANOVA table                          | SS               | DF                                 |                  |                  |                  |       |                 |  |
| Treatment (between columns)          | 0,000006076      | 3                                  |                  |                  |                  |       |                 |  |
| Residual (within columns)            | 0,00001035       | 5                                  |                  |                  |                  |       |                 |  |
| Total                                | 0,00001643       | 8                                  |                  |                  |                  |       |                 |  |

| <b>Table Analyzed</b>                  |                      | <b>VWM treatment effects Trib3</b> |              |             |                  |     |                 |      |
|----------------------------------------|----------------------|------------------------------------|--------------|-------------|------------------|-----|-----------------|------|
| Welch's ANOVA test                     | 5,409 (3,000, 8,400) |                                    |              |             |                  |     |                 |      |
| W (DFn, DFd)                           | 0,0233               |                                    |              |             |                  |     |                 |      |
| P value                                | -                    |                                    |              |             |                  |     |                 |      |
| P value summary                        |                      |                                    |              |             |                  |     |                 |      |
| Dunnett's T3 multiple comparisons test | Mean Diff.           | 95,00% CI of diff.                 | Significant? | Summary     | Adjusted P Value | A-? |                 |      |
| Placebo vs. Seph1 4,5 mg/kg            | 0,03603              | -0,3444 to 0,4165                  | No           | ns          | 0,924            | B   | Seph1 4,5 mg/kg |      |
| Placebo vs. Gbz 10 mg/kg               | 0,07842              | 0,0004601 to 0,1564                | Yes          | *           | 0,0242           | C   | Gbz 10 mg/kg    |      |
| Placebo vs. Gbz 4,5 mg/kg              | 0,1123               | 0,01575 to 0,2089                  | Yes          | *           | 0,0109           | D   | Gbz 4,5 mg/kg   |      |
| Test details                           | Mean 1               | Mean 2                             | Mean Diff.   | SE of diff. | n1               | n2  | t               | DF   |
| Placebo vs. Seph1 4,5 mg/kg            | 0,3998               | 0,3637                             | 0,03603      | 0,06648     | 6                | 4   | 0,5419          | 3,38 |
| Placebo vs. Gbz 10 mg/kg               | 0,3998               | 0,3213                             | 0,07842      | 0,02403     | 6                | 6   | 3,263           | 9,92 |
| Placebo vs. Gbz 4,5 mg/kg              | 0,3998               | 0,2874                             | 0,1123       | 0,02905     | 6                | 6   | 3,867           | 8,76 |

| <b>Table Analyzed</b>       |                  | <b>WT-VWM placebo Gadd34</b> |  |
|-----------------------------|------------------|------------------------------|--|
| Unpaired t test             | <0,0001          |                              |  |
| P value                     | ****             |                              |  |
| P value summary             | One-tailed       |                              |  |
| One- or two-tailed P value? | t=11,41, df=6    |                              |  |
| t, df                       |                  |                              |  |
| Mean WT                     | 0,0873           |                              |  |
| Mean VWM                    | 0,2447           |                              |  |
| 95% confidence interval     | 0,1236 to 0,1911 |                              |  |

| <b>Table Analyzed</b>       |           | <b>WT treatment effects Gadd34</b> |  |
|-----------------------------|-----------|------------------------------------|--|
| ANOVA summary               | 3,998     |                                    |  |
| F                           | 0,085     |                                    |  |
| P value                     | ns        |                                    |  |
| P value summary             |           |                                    |  |
| ANOVA table                 | SS        | DF                                 |  |
| Treatment (between columns) | 0,0009824 | 3                                  |  |
| Residual (within columns)   | 0,0004096 | 5                                  |  |
| Total                       | 0,001392  | 8                                  |  |

| <b>Table Analyzed</b>       |          | <b>VWM treatment effects Gadd34</b> |  |
|-----------------------------|----------|-------------------------------------|--|
| ANOVA summary               | 1,52     |                                     |  |
| F                           | 0,2434   |                                     |  |
| P value                     | ns       |                                     |  |
| P value summary             |          |                                     |  |
| ANOVA table                 | SS       | DF                                  |  |
| Treatment (between columns) | 0,009111 | 3                                   |  |
| Residual (within columns)   | 0,03596  | 18                                  |  |
| Total                       | 0,04508  | 21                                  |  |



**Figure 9**

| Table Analyzed                          |                   | min $\alpha$ 2 CHOP, without ER stress   |                  |                   |                  |       |          |  |
|-----------------------------------------|-------------------|------------------------------------------|------------------|-------------------|------------------|-------|----------|--|
| ANOVA summary                           |                   |                                          |                  |                   |                  |       |          |  |
| F                                       | 1,343             |                                          |                  |                   |                  |       |          |  |
| P value                                 | 0,3086            |                                          |                  |                   |                  |       |          |  |
| P value summary                         | ns                |                                          |                  |                   |                  |       |          |  |
| ANOVA table                             | SS                | DF                                       | MS               | F (DFn, DFd)      | P value          |       |          |  |
| Treatment (between columns)             | 0,04447           | 2                                        | 0,02224          | F (2, 9) = 1,343  | P=0,3086         |       |          |  |
| Residual (within columns)               | 0,149             | 9                                        | 0,01655          |                   |                  |       |          |  |
| Total                                   | 0,1934            | 11                                       |                  |                   |                  |       |          |  |
| Table Analyzed                          |                   | plus $\alpha$ 2 CHOP, without ER stress  |                  |                   |                  |       |          |  |
| ANOVA summary                           |                   |                                          |                  |                   |                  |       |          |  |
| F                                       | 1,039             |                                          |                  |                   |                  |       |          |  |
| P value                                 | 0,3926            |                                          |                  |                   |                  |       |          |  |
| P value summary                         | ns                |                                          |                  |                   |                  |       |          |  |
| ANOVA table                             | SS                | DF                                       | MS               | F (DFn, DFd)      | P value          |       |          |  |
| Treatment (between columns)             | 0,009861          | 2                                        | 0,00493          | F (2, 9) = 1,039  | P=0,3926         |       |          |  |
| Residual (within columns)               | 0,04271           | 9                                        | 0,004745         |                   |                  |       |          |  |
| Total                                   | 0,05257           | 11                                       |                  |                   |                  |       |          |  |
| Table Analyzed                          |                   | min $\alpha$ 2 CHOP, ER stress           |                  |                   |                  |       |          |  |
| Mann Whitney test                       |                   |                                          |                  |                   |                  |       |          |  |
| P value                                 | 0,0011            |                                          |                  |                   |                  |       |          |  |
| Exact or approximate P value?           | Exact             |                                          |                  |                   |                  |       |          |  |
| P value summary                         | **                |                                          |                  |                   |                  |       |          |  |
| One- or two-tailed P value?             | One-tailed        |                                          |                  |                   |                  |       |          |  |
| Sum of ranks in column A,E              | 21, 57            |                                          |                  |                   |                  |       |          |  |
| Mann-Whitney U                          | 0                 |                                          |                  |                   |                  |       |          |  |
| Median of DMSO                          | 0,07936, n=6      |                                          |                  |                   |                  |       |          |  |
| Median of TG                            | 1,414, n=6        |                                          |                  |                   |                  |       |          |  |
| Difference: Actual                      | 1,334             |                                          |                  |                   |                  |       |          |  |
| Difference: Hodges-Lehmann              | 1,343             |                                          |                  |                   |                  |       |          |  |
| Table Analyzed                          |                   | min $\alpha$ 2 CHOP, ER stress           |                  |                   |                  |       |          |  |
| ANOVA summary                           |                   |                                          |                  |                   |                  |       |          |  |
| F                                       | 4,735             |                                          |                  |                   |                  |       |          |  |
| P value                                 | 0,0255            |                                          |                  |                   |                  |       |          |  |
| P value summary                         | *                 |                                          |                  |                   |                  |       |          |  |
| ANOVA table                             | SS                | DF                                       | MS               | F (DFn, DFd)      | P value          |       |          |  |
| Treatment (between columns)             | 2,968             | 2                                        | 1,484            | F (2, 15) = 4,735 | P=0,0255         |       |          |  |
| Residual (within columns)               | 4,702             | 15                                       | 0,3135           |                   |                  |       |          |  |
| Total                                   | 7,67              | 17                                       |                  |                   |                  |       |          |  |
| Dunnett's multiple comparisons test     | Mean Diff.        | 95,00% CI of diff.                       | Below threshold? | Summary           | Adjusted P Value | E-?   |          |  |
| TG 0,33 $\mu$ M vs. TG + S1             | 0,856             | 0,06751 to 1,644                         | Yes              | *                 | 0,0334           | F     | TG + S1  |  |
| TG 0,33 $\mu$ M vs. TG + GBZ            | 0,8667            | 0,07823 to 1,655                         | Yes              | *                 | 0,0313           | G     | TG + GBZ |  |
| Test details                            | Mean 1            | Mean 2                                   | Mean Diff.       | SE of diff.       | n1               | n2    | q        |  |
| TG 0,33 $\mu$ M vs. TG + S1             | 1,367             | 0,5107                                   | 0,856            | 0,3232            | 6                | 6     | 2,648    |  |
| TG 0,33 $\mu$ M vs. TG + GBZ            | 1,367             | 0,5                                      | 0,8667           | 0,3232            | 6                | 6     | 2,681    |  |
| DF                                      |                   |                                          |                  |                   |                  |       | 15       |  |
| DF                                      |                   |                                          |                  |                   |                  |       | 15       |  |
| Table Analyzed                          |                   | plus $\alpha$ 2 CHOP, ER stress          |                  |                   |                  |       |          |  |
| Unpaired t test                         |                   |                                          |                  |                   |                  |       |          |  |
| P value                                 | 0,0063            |                                          |                  |                   |                  |       |          |  |
| P value summary                         | **                |                                          |                  |                   |                  |       |          |  |
| One- or two-tailed P value?             | One-tailed        |                                          |                  |                   |                  |       |          |  |
| t, df                                   | t=3,031, df=10    |                                          |                  |                   |                  |       |          |  |
| Mean of DMSO                            | 0,1349            |                                          |                  |                   |                  |       |          |  |
| Mean of TG                              | 0,5198            |                                          |                  |                   |                  |       |          |  |
| 95% confidence interval                 | 0,1020 to 0,6678  |                                          |                  |                   |                  |       |          |  |
| Table Analyzed                          |                   | plus $\alpha$ 2 CHOP, ER stress          |                  |                   |                  |       |          |  |
| Kruskal-Wallis test                     |                   |                                          |                  |                   |                  |       |          |  |
| P value                                 | 0,0327            |                                          |                  |                   |                  |       |          |  |
| Exact or approximate P value?           | Exact             |                                          |                  |                   |                  |       |          |  |
| P value summary                         | *                 |                                          |                  |                   |                  |       |          |  |
| Number of groups                        | 3                 |                                          |                  |                   |                  |       |          |  |
| Kruskal-Wallis statistic                | 6,468             |                                          |                  |                   |                  |       |          |  |
| Dunn's multiple comparisons test        | Mean rank diff.   | Significant?                             | Summary          | Adjusted P Value  | E-?              |       |          |  |
| TG 0,33 $\mu$ M vs. TG + S1             | 6,333             | No                                       | ns               | 0,0798            | F                |       | TG + S1  |  |
| TG 0,33 $\mu$ M vs. TG + GBZ            | 7,167             | Yes                                      | *                | 0,0401            | G                |       | TG + GBZ |  |
| Test details                            | Mean rank 1       | Mean rank 2                              | Mean rank diff.  | n1                | n2               | Z     |          |  |
| TG 0,33 $\mu$ M vs. TG + S1             | 14                | 7,667                                    | 6,333            | 6                 | 6                | 2,055 |          |  |
| TG 0,33 $\mu$ M vs. TG + GBZ            | 14                | 6,833                                    | 7,167            | 6                 | 6                | 2,325 |          |  |
| Table Analyzed                          |                   | min $\alpha$ 2 Trib3, without ER stress  |                  |                   |                  |       |          |  |
| ANOVA summary                           |                   |                                          |                  |                   |                  |       |          |  |
| F                                       | 0,7322            |                                          |                  |                   |                  |       |          |  |
| P value                                 | 0,5074            |                                          |                  |                   |                  |       |          |  |
| P value summary                         | ns                |                                          |                  |                   |                  |       |          |  |
| ANOVA table                             | SS                | DF                                       | MS               | F (DFn, DFd)      | P value          |       |          |  |
| Treatment (between columns)             | 0,1282            | 2                                        | 0,0641           | F (2, 9) = 0,7322 | P=0,5074         |       |          |  |
| Residual (within columns)               | 0,7879            | 9                                        | 0,08755          |                   |                  |       |          |  |
| Total                                   | 0,9161            | 11                                       |                  |                   |                  |       |          |  |
| Table Analyzed                          |                   | plus $\alpha$ 2 Trib3, without ER stress |                  |                   |                  |       |          |  |
| ANOVA summary                           |                   |                                          |                  |                   |                  |       |          |  |
| F                                       | 0,7063            |                                          |                  |                   |                  |       |          |  |
| P value                                 | 0,5189            |                                          |                  |                   |                  |       |          |  |
| P value summary                         | ns                |                                          |                  |                   |                  |       |          |  |
| ANOVA table                             | SS                | DF                                       | MS               | F (DFn, DFd)      | P value          |       |          |  |
| Treatment (between columns)             | 0,07069           | 2                                        | 0,03535          | F (2, 9) = 0,7063 | P=0,5189         |       |          |  |
| Residual (within columns)               | 0,4504            | 9                                        | 0,05004          |                   |                  |       |          |  |
| Total                                   | 0,5211            | 11                                       |                  |                   |                  |       |          |  |
| Table Analyzed                          |                   | min $\alpha$ 2 Trib3, ER stress          |                  |                   |                  |       |          |  |
| Unpaired t test with Welch's correction |                   |                                          |                  |                   |                  |       |          |  |
| P value                                 | <0,0001           |                                          |                  |                   |                  |       |          |  |
| P value summary                         | ****              |                                          |                  |                   |                  |       |          |  |
| One- or two-tailed P value?             | One-tailed        |                                          |                  |                   |                  |       |          |  |
| Welch-corrected t, df                   | t=12,45, df=5,435 |                                          |                  |                   |                  |       |          |  |
| Mean of DMSO                            | 0,3776            |                                          |                  |                   |                  |       |          |  |
| Mean of TG                              | 2,666             |                                          |                  |                   |                  |       |          |  |
| 95% confidence interval                 | 1,827 to 2,750    |                                          |                  |                   |                  |       |          |  |
| Table Analyzed                          |                   | min $\alpha$ 2 Trib3, ER stress          |                  |                   |                  |       |          |  |
| ANOVA summary                           |                   |                                          |                  |                   |                  |       |          |  |
| F                                       | 4,894             |                                          |                  |                   |                  |       |          |  |
| P value                                 | 0,0231            |                                          |                  |                   |                  |       |          |  |
| P value summary                         | *                 |                                          |                  |                   |                  |       |          |  |
| ANOVA table                             | SS                | DF                                       | MS               | F (DFn, DFd)      | P value          |       |          |  |
| Treatment (between columns)             | 3,531             | 2                                        | 1,766            | F (2, 15) = 4,894 | P=0,0231         |       |          |  |
| Residual (within columns)               | 5,412             | 15                                       | 0,3608           |                   |                  |       |          |  |
| Total                                   | 8,944             | 17                                       |                  |                   |                  |       |          |  |
| Dunnett's multiple comparisons test     | Mean Diff.        | 95,00% CI of diff.                       | Below threshold? | Summary           | Adjusted P Value | E-?   |          |  |
| TG 0,33 $\mu$ M vs. TG + S1             | 1,076             | 0,2303 to 1,922                          | Yes              | *                 | 0,0135           | F     | TG + S1  |  |
| TG 0,33 $\mu$ M vs. TG + GBZ            | 0,6567            | -0,1892 to 1,503                         | No               | ns                | 0,1357           | G     | TG + GBZ |  |
| Test details                            | Mean 1            | Mean 2                                   | Mean Diff.       | SE of diff.       | n1               | n2    | q        |  |
| TG 0,33 $\mu$ M vs. TG + S1             | 2,666             | 1,59                                     | 1,076            | 0,3468            | 6                | 6     | 3,103    |  |
| TG 0,33 $\mu$ M vs. TG + GBZ            | 2,666             | 2,009                                    | 0,6567           | 0,3468            | 6                | 6     | 1,894    |  |
| DF                                      |                   |                                          |                  |                   |                  |       | 15       |  |
| DF                                      |                   |                                          |                  |                   |                  |       | 15       |  |

|                                         |                                                             |                    |                  |                   |                  |     |       |          |    |
|-----------------------------------------|-------------------------------------------------------------|--------------------|------------------|-------------------|------------------|-----|-------|----------|----|
| <b>Table Analyzed</b>                   | <b>plus <math>\alpha 2</math> Trib3, ER stress</b>          |                    |                  |                   |                  |     |       |          |    |
| Unpaired t test                         |                                                             |                    |                  |                   |                  |     |       |          |    |
| P value                                 | <0,0001                                                     |                    |                  |                   |                  |     |       |          |    |
| P value summary                         | ****                                                        |                    |                  |                   |                  |     |       |          |    |
| One- or two-tailed P value?             | One-tailed                                                  |                    |                  |                   |                  |     |       |          |    |
| t, df                                   | t=17,48, df=10                                              |                    |                  |                   |                  |     |       |          |    |
| Mean of DMSO                            | 0,4336                                                      |                    |                  |                   |                  |     |       |          |    |
| Mean of TG                              | 1,727                                                       |                    |                  |                   |                  |     |       |          |    |
| 95% confidence interval                 | 1,128 to 1,458                                              |                    |                  |                   |                  |     |       |          |    |
| <b>Table Analyzed</b>                   | <b>plus <math>\alpha 2</math> Trib3, ER stress</b>          |                    |                  |                   |                  |     |       |          |    |
| ANOVA summary                           |                                                             |                    |                  |                   |                  |     |       |          |    |
| F                                       | 14,56                                                       |                    |                  |                   |                  |     |       |          |    |
| P value                                 | 0,0003                                                      |                    |                  |                   |                  |     |       |          |    |
| P value summary                         | ***                                                         |                    |                  |                   |                  |     |       |          |    |
| ANOVA table                             | SS                                                          | DF                 | MS               | F (DFn, DFd)      | P value          |     |       |          |    |
| Treatment (between columns)             | 2,845                                                       | 2                  | 1,422            | F (2, 15) = 14,56 | P=0,0003         |     |       |          |    |
| Residual (within columns)               | 1,466                                                       | 15                 | 0,0977           |                   |                  |     |       |          |    |
| Total                                   | 4,31                                                        | 17                 |                  |                   |                  |     |       |          |    |
| Dunnnett's multiple comparisons test    | Mean Diff,                                                  | 95,00% CI of diff, | Below threshold? | Summary           | Adjusted P Value | E-? |       |          |    |
| TG 0,33 $\mu$ M vs. TG + S1             | 0,842                                                       | 0,4018 to 1,282    | Yes              | ***               | 0,0006           | F   |       | TG + S1  |    |
| TG 0,33 $\mu$ M vs. TG + GBZ            | 0,8447                                                      | 0,4045 to 1,285    | Yes              | ***               | 0,0006           | G   |       | TG + GBZ |    |
| Test details                            | Mean 1                                                      | Mean 2             | Mean Diff,       | SE of diff,       | n1               | n2  | q     |          | DF |
| TG 0,33 $\mu$ M vs. TG + S1             | 1,727                                                       | 0,8848             | 0,842            | 0,1805            | 6                | 6   | 4,666 |          | 15 |
| TG 0,33 $\mu$ M vs. TG + GBZ            | 1,727                                                       | 0,8821             | 0,8447           | 0,1805            | 6                | 6   | 4,68  |          | 15 |
| <b>Table Analyzed</b>                   | <b>min <math>\alpha 2</math> Gadd34, without ER stress</b>  |                    |                  |                   |                  |     |       |          |    |
| Kruskal-Wallis test                     |                                                             |                    |                  |                   |                  |     |       |          |    |
| P value                                 | 0,3697                                                      |                    |                  |                   |                  |     |       |          |    |
| Exact or approximate P value?           | Exact                                                       |                    |                  |                   |                  |     |       |          |    |
| P value summary                         | ns                                                          |                    |                  |                   |                  |     |       |          |    |
| Number of groups                        | 3                                                           |                    |                  |                   |                  |     |       |          |    |
| Kruskal-Wallis statistic                | 2,192                                                       |                    |                  |                   |                  |     |       |          |    |
| <b>Table Analyzed</b>                   | <b>plus <math>\alpha 2</math> Gadd34, without ER stress</b> |                    |                  |                   |                  |     |       |          |    |
| Kruskal-Wallis test                     |                                                             |                    |                  |                   |                  |     |       |          |    |
| P value                                 | 0,4803                                                      |                    |                  |                   |                  |     |       |          |    |
| Exact or approximate P value?           | Exact                                                       |                    |                  |                   |                  |     |       |          |    |
| P value summary                         | ns                                                          |                    |                  |                   |                  |     |       |          |    |
| Number of groups                        | 3                                                           |                    |                  |                   |                  |     |       |          |    |
| Kruskal-Wallis statistic                | 1,654                                                       |                    |                  |                   |                  |     |       |          |    |
| <b>Table Analyzed</b>                   | <b>min <math>\alpha 2</math> Gadd34, ER stress</b>          |                    |                  |                   |                  |     |       |          |    |
| Unpaired t test with Welch's correction |                                                             |                    |                  |                   |                  |     |       |          |    |
| P value                                 | 0,0001                                                      |                    |                  |                   |                  |     |       |          |    |
| P value summary                         | ***                                                         |                    |                  |                   |                  |     |       |          |    |
| One- or two-tailed P value?             | One-tailed                                                  |                    |                  |                   |                  |     |       |          |    |
| Welch-corrected t, df                   | t=8,848, df=5,077                                           |                    |                  |                   |                  |     |       |          |    |
| Mean of DMSO                            | 0,1013                                                      |                    |                  |                   |                  |     |       |          |    |
| Mean of TG                              | 1,453                                                       |                    |                  |                   |                  |     |       |          |    |
| 95% confidence interval                 | 0,9606 to 1,742                                             |                    |                  |                   |                  |     |       |          |    |
| <b>Table Analyzed</b>                   | <b>min <math>\alpha 2</math> Gadd34, ER stress</b>          |                    |                  |                   |                  |     |       |          |    |
| ANOVA summary                           |                                                             |                    |                  |                   |                  |     |       |          |    |
| F                                       | 7,718                                                       |                    |                  |                   |                  |     |       |          |    |
| P value                                 | 0,005                                                       |                    |                  |                   |                  |     |       |          |    |
| P value summary                         | **                                                          |                    |                  |                   |                  |     |       |          |    |
| ANOVA table                             | SS                                                          | DF                 | MS               | F (DFn, DFd)      | P value          |     |       |          |    |
| Treatment (between columns)             | 1,568                                                       | 2                  | 0,7838           | F (2, 15) = 7,718 | P=0,0050         |     |       |          |    |
| Residual (within columns)               | 1,523                                                       | 15                 | 0,1016           |                   |                  |     |       |          |    |
| Total                                   | 3,091                                                       | 17                 |                  |                   |                  |     |       |          |    |
| Dunnnett's multiple comparisons test    | Mean Diff,                                                  | 95,00% CI of diff, | Below threshold? | Summary           | Adjusted P Value | E-? |       |          |    |
| TG 0,33 $\mu$ M vs. TG + S1             | 0,5304                                                      | 0,08158 to 0,9792  | Yes              | *                 | 0,021            | F   |       | TG + S1  |    |
| TG 0,33 $\mu$ M vs. TG + GBZ            | 0,6905                                                      | 0,2417 to 1,139    | Yes              | **                | 0,0036           | G   |       | TG + GBZ |    |
| Test details                            | Mean 1                                                      | Mean 2             | Mean Diff,       | SE of diff,       | n1               | n2  | q     |          | DF |
| TG 0,33 $\mu$ M vs. TG + S1             | 1,453                                                       | 0,9224             | 0,5304           | 0,184             | 6                | 6   | 2,883 |          | 15 |
| TG 0,33 $\mu$ M vs. TG + GBZ            | 1,453                                                       | 0,7622             | 0,6905           | 0,184             | 6                | 6   | 3,753 |          | 15 |
| <b>Table Analyzed</b>                   | <b>plus <math>\alpha 2</math> Gadd34, ER stress</b>         |                    |                  |                   |                  |     |       |          |    |
| Unpaired t test                         |                                                             |                    |                  |                   |                  |     |       |          |    |
| P value                                 | <0,0001                                                     |                    |                  |                   |                  |     |       |          |    |
| P value summary                         | ****                                                        |                    |                  |                   |                  |     |       |          |    |
| One- or two-tailed P value?             | One-tailed                                                  |                    |                  |                   |                  |     |       |          |    |
| t, df                                   | t=10,24, df=10                                              |                    |                  |                   |                  |     |       |          |    |
| Mean of DMSO                            | 0,1186                                                      |                    |                  |                   |                  |     |       |          |    |
| Mean of TG                              | 0,7364                                                      |                    |                  |                   |                  |     |       |          |    |
| 95% confidence interval                 | 0,4835 to 0,7522                                            |                    |                  |                   |                  |     |       |          |    |
| <b>Table Analyzed</b>                   | <b>plus <math>\alpha 2</math> Gadd34, ER stress</b>         |                    |                  |                   |                  |     |       |          |    |
| ANOVA summary                           |                                                             |                    |                  |                   |                  |     |       |          |    |
| F                                       | 9,228                                                       |                    |                  |                   |                  |     |       |          |    |
| P value                                 | 0,0024                                                      |                    |                  |                   |                  |     |       |          |    |
| P value summary                         | **                                                          |                    |                  |                   |                  |     |       |          |    |
| R squared                               | 0,5517                                                      |                    |                  |                   |                  |     |       |          |    |
| ANOVA table                             | SS                                                          | DF                 | MS               | F (DFn, DFd)      | P value          |     |       |          |    |
| Treatment (between columns)             | 0,2148                                                      | 2                  | 0,1074           | F (2, 15) = 9,228 | P=0,0024         |     |       |          |    |
| Residual (within columns)               | 0,1746                                                      | 15                 | 0,01164          |                   |                  |     |       |          |    |
| Total                                   | 0,3894                                                      | 17                 |                  |                   |                  |     |       |          |    |

## Supp. Fig. 1

|                                                |                                                 |
|------------------------------------------------|-------------------------------------------------|
| <b>Table Analyzed</b>                          | <b>WT placebo injection &amp; no injection</b>  |
| Paired t test                                  |                                                 |
| P value                                        | 0,2144                                          |
| P value summary                                | ns                                              |
| One- or two-tailed P value?                    | Two-tailed                                      |
| t, df                                          | t=-1,570, df=3                                  |
| Number of pairs                                | 4                                               |
| Mean of differences (injection - no injection) | 1,108                                           |
| SD of differences                              | 1,412                                           |
| 95% confidence interval                        | -1,138 to 3,355                                 |
| <b>Table Analyzed</b>                          | <b>WT S1 injection &amp; no injection</b>       |
| Paired t test                                  |                                                 |
| P value                                        | 0,2809                                          |
| P value summary                                | ns                                              |
| One- or two-tailed P value?                    | Two-tailed                                      |
| t, df                                          | t=-1,312, df=3                                  |
| Number of pairs                                | 4                                               |
| Mean of differences (injection - no injection) | -1,362                                          |
| SD of differences                              | 2,076                                           |
| 95% confidence interval                        | -4,666 to 1,942                                 |
| <b>Table Analyzed</b>                          | <b>WT GBZ10 injection &amp; no injection</b>    |
| Paired t test                                  |                                                 |
| P value                                        | 0,0264                                          |
| P value summary                                | *                                               |
| One- or two-tailed P value?                    | One-tailed                                      |
| t, df                                          | t=3,112, df=3                                   |
| Number of pairs                                | 4                                               |
| Mean of differences (injection - no injection) | 133,9                                           |
| SD of differences                              | 86,03                                           |
| 95% confidence interval                        | -3,035 to 270,8                                 |
| <b>Table Analyzed</b>                          | <b>WT GBZ4,5 injection &amp; no injection</b>   |
| Paired t test                                  |                                                 |
| P value                                        | 0,0059                                          |
| P value summary                                | **                                              |
| One- or two-tailed P value?                    | One-tailed                                      |
| t, df                                          | t=5,493, df=3                                   |
| Number of pairs                                | 4                                               |
| Mean of differences (injection - no injection) | 174,8                                           |
| SD of differences                              | 63,64                                           |
| 95% confidence interval                        | 73,51 to 276,0                                  |
| <b>Table Analyzed</b>                          | <b>VWM placebo injection &amp; no injection</b> |
| Paired t test                                  |                                                 |
| P value                                        | 0,2472                                          |
| P value summary                                | ns                                              |
| One- or two-tailed P value?                    | Two-tailed                                      |
| t, df                                          | t=-1,433, df=3                                  |
| Number of pairs                                | 4                                               |
| Mean of differences (injection - no injection) | 2,304                                           |
| SD of differences                              | 3,215                                           |
| 95% confidence interval                        | -2,811 to 7,419                                 |
| <b>Table Analyzed</b>                          | <b>VWM S1 injection &amp; no injection</b>      |
| Paired t test                                  |                                                 |
| P value                                        | 0,6195                                          |
| P value summary                                | ns                                              |
| One- or two-tailed P value?                    | Two-tailed                                      |
| t, df                                          | t=-0,5518, df=3                                 |
| Number of pairs                                | 4                                               |
| Mean of differences (injection - no injection) | 0,9126                                          |
| SD of differences                              | 3,307                                           |
| 95% confidence interval                        | -4,350 to 6,175                                 |
| <b>Table Analyzed</b>                          | <b>VWM GBZ10 injection &amp; no injection</b>   |
| Paired t test                                  |                                                 |
| P value                                        | 0,003                                           |
| P value summary                                | **                                              |
| One- or two-tailed P value?                    | One-tailed                                      |
| t, df                                          | t=7,030, df=3                                   |
| Number of pairs                                | 4                                               |
| Mean of differences (injection - no injection) | 152                                             |
| SD of differences                              | 43,25                                           |
| 95% confidence interval                        | 83,21 to 220,9                                  |
| <b>Table Analyzed</b>                          | <b>VWM GBZ4,5 injection &amp; no injection</b>  |
| Paired t test                                  |                                                 |
| P value                                        | 0,0129                                          |
| P value summary                                | *                                               |
| One- or two-tailed P value?                    | One-tailed                                      |
| t, df                                          | t=4,124, df=3                                   |
| Number of pairs                                | 4                                               |
| Mean of differences (injection - no injection) | 151,9                                           |
| SD of differences                              | 73,67                                           |
| 95% confidence interval                        | 34,69 to 269,1                                  |
| <b>Table Analyzed</b>                          | <b>WT gbz 10 inj, 1 vs 3</b>                    |
| Paired t test                                  |                                                 |
| P value                                        | 0,9073                                          |
| P value summary                                | ns                                              |
| One- or two-tailed P value?                    | Two-tailed                                      |
| t, df                                          | t=0,1266, df=3                                  |
| Number of pairs                                | 4                                               |
| Mean of differences (inj 3 - inj 1)            | -8,835                                          |
| SD of differences                              | 139,6                                           |
| 95% confidence interval                        | -230,9 to 213,3                                 |
| <b>Table Analyzed</b>                          | <b>WT gbz 10 inj, 1 vs 4</b>                    |
| Wilcoxon matched-pairs signed rank test        |                                                 |
| P value                                        | 0,875                                           |
| Exact or approximate P value?                  | Exact                                           |
| P value summary                                | ns                                              |
| One- or two-tailed P value?                    | Two-tailed                                      |
| Sum of positive, negative ranks                | 4,000 , -6,000                                  |
| Sum of signed ranks (W)                        | -2                                              |
| Number of pairs                                | 4                                               |
| Number of ties (ignored)                       | 0                                               |
| Median                                         | -82,74                                          |
| <b>Table Analyzed</b>                          | <b>WT gbz 4,5 inj, 1 vs 3</b>                   |
| Paired t test                                  |                                                 |
| P value                                        | 0,0049                                          |
| P value summary                                | **                                              |
| One- or two-tailed P value?                    | One-tailed                                      |
| t, df                                          | t=5,893, df=3                                   |
| Number of pairs                                | 4                                               |
| Mean of differences (inj 3 - inj 1)            | -131,3                                          |
| SD of differences                              | 44,57                                           |
| 95% confidence interval                        | -202,2 to -60,41                                |

| Table Analyzed                      |                  | WT gbz 4,5 inj, 1 vs 4 |
|-------------------------------------|------------------|------------------------|
| Paired t test                       |                  |                        |
| P value                             | 0,0095           | **                     |
| P value summary                     | **               |                        |
| One- or two-tailed P value?         | One-tailed       |                        |
| t, df                               | t=-4,632, df=3   |                        |
| Number of pairs                     | 4                |                        |
| Mean of differences (inj 4 - inj 1) | -103,6           |                        |
| SD of differences                   | 44,72            |                        |
| 95% confidence interval             | -174,7 to -32,41 |                        |

| Table Analyzed                      |                 | VWM GBZ 10 inj, 1 vs 3 |
|-------------------------------------|-----------------|------------------------|
| Paired t test                       |                 |                        |
| P value                             | 0,3876          |                        |
| P value summary                     | ns              |                        |
| One- or two-tailed P value?         | Two-tailed      |                        |
| t, df                               | t=1,008, df=3   |                        |
| Number of pairs                     | 4               |                        |
| Mean of differences (inj 3 - inj 1) | 14,53           |                        |
| SD of differences                   | 28,83           |                        |
| 95% confidence interval             | -31,34 to 60,41 |                        |

| Table Analyzed                      |                 | VWM GBZ 10 inj, 1 vs 4 |
|-------------------------------------|-----------------|------------------------|
| Paired t test                       |                 |                        |
| P value                             | 0,4089          |                        |
| P value summary                     | ns              |                        |
| One- or two-tailed P value?         | Two-tailed      |                        |
| t, df                               | t=0,9576, df=3  |                        |
| Number of pairs                     | 4               |                        |
| Mean of differences (inj 4 - inj 1) | -37,36          |                        |
| SD of differences                   | 78,04           |                        |
| 95% confidence interval             | -161,5 to 86,81 |                        |

| Table Analyzed                      |                 | VWM GBZ 4,5 inj, 1 vs 3 |
|-------------------------------------|-----------------|-------------------------|
| Paired t test                       |                 |                         |
| P value                             | 0,0271          | *                       |
| P value summary                     | *               |                         |
| One- or two-tailed P value?         | One-tailed      |                         |
| t, df                               | t=3,080, df=3   |                         |
| Number of pairs                     | 4               |                         |
| Mean of differences (inj 3 - inj 1) | -126,3          |                         |
| SD of differences                   | 82              |                         |
| 95% confidence interval             | -256,7 to 4,209 |                         |

| Table Analyzed                      |                  | VWM GBZ 4,5 inj, 1 vs 4 |
|-------------------------------------|------------------|-------------------------|
| Paired t test                       |                  |                         |
| P value                             | 0,0083           | **                      |
| P value summary                     | **               |                         |
| One- or two-tailed P value?         | One-tailed       |                         |
| t, df                               | t=-4,856, df=3   |                         |
| Number of pairs                     | 4                |                         |
| Mean of differences (inj 4 - inj 1) | -85,68           |                         |
| SD of differences                   | 35,29            |                         |
| 95% confidence interval             | -141,8 to -29,52 |                         |

| Table Analyzed  |        | AUC WT hypothermia GBZ treatments |  |  |  |  |  |  |
|-----------------|--------|-----------------------------------|--|--|--|--|--|--|
| ANOVA summary   |        |                                   |  |  |  |  |  |  |
| F               | 0,8004 |                                   |  |  |  |  |  |  |
| P value         | 0,4787 |                                   |  |  |  |  |  |  |
| P value summary | ns     |                                   |  |  |  |  |  |  |

| ANOVA table                 | SS    | DF | MS   | F (DFn, DFd)      | P value  |
|-----------------------------|-------|----|------|-------------------|----------|
| Treatment (between columns) | 12260 | 2  | 6130 | F (2, 9) = 0,8004 | P=0,4787 |
| Residual (within columns)   | 68928 | 9  | 7659 |                   |          |
| Total                       | 81187 | 11 |      |                   |          |

  

| Tukey's multiple comparisons test | Mean Diff. | 95,00% CI of diff. | Below threshold? | Summary | Adjusted P Value |
|-----------------------------------|------------|--------------------|------------------|---------|------------------|
| WT Gbz10 vs. WT Gbz4,5            | -42,66     | -215,4 to 130,1    | No               | ns      | 0,7754           |

  

| Test details           | Mean 1 | Mean 2 | Mean Diff. | SE of diff. | n1 | n2 | q      | DF |
|------------------------|--------|--------|------------|-------------|----|----|--------|----|
| WT Gbz10 vs. WT Gbz4,5 | 137,9  | 180,6  | -42,66     | 61,88       | 4  | 4  | 0,9748 | 9  |

| Table Analyzed  |        | AUC VWM hypothermia GBZ treatments |  |  |  |  |  |  |
|-----------------|--------|------------------------------------|--|--|--|--|--|--|
| ANOVA summary   |        |                                    |  |  |  |  |  |  |
| F               | 1,246  |                                    |  |  |  |  |  |  |
| P value         | 0,3329 |                                    |  |  |  |  |  |  |
| P value summary | ns     |                                    |  |  |  |  |  |  |

| ANOVA table                 | SS    | DF | MS   | F (DFn, DFd)     | P value  |
|-----------------------------|-------|----|------|------------------|----------|
| Treatment (between columns) | 13317 | 2  | 6658 | F (2, 9) = 1,246 | P=0,3329 |
| Residual (within columns)   | 48094 | 9  | 5344 |                  |          |
| Total                       | 61411 | 11 |      |                  |          |

  

| Tukey's multiple comparisons test | Mean Diff. | 95,00% CI of diff. | Below threshold? | Summary | Adjusted P Value |
|-----------------------------------|------------|--------------------|------------------|---------|------------------|
| Mut Gbz10 vs. Mut Gbz4,5          | 2,53       | -141,8 to 146,9    | No               | ns      | 0,9987           |

  

| Test details             | Mean 1 | Mean 2 | Mean Diff. | SE of diff. | n1 | n2 | q       | DF |
|--------------------------|--------|--------|------------|-------------|----|----|---------|----|
| Mut Gbz10 vs. Mut Gbz4,5 | 155,8  | 153,2  | 2,53       | 51,69       | 4  | 4  | 0,06922 | 9  |

**Supp. Fig. 4**

| <b>Table Analyzed</b>               |        | <b>Ddit3 24H</b>  |                      |            |                  |          |                  |
|-------------------------------------|--------|-------------------|----------------------|------------|------------------|----------|------------------|
| ANOVA summary                       |        |                   |                      |            |                  |          |                  |
| F                                   | 5,817  |                   |                      |            |                  |          |                  |
| P value                             | 0,0239 |                   |                      |            |                  |          |                  |
| P value summary                     |        |                   |                      |            |                  |          |                  |
| ANOVA table                         |        | SS                | DF                   | MS         | F (DFn, DFd)     | P value  |                  |
| Treatment (between columns)         |        | 0,003682          | 2                    | 0,001841   | F (2, 9) = 5,817 | P=0,0239 |                  |
| Residual (within columns)           |        | 0,002849          | 9                    | 0,0003165  |                  |          |                  |
| Total                               |        | 0,006531          | 11                   |            |                  |          |                  |
| Dunnett's multiple comparisons test |        | Mean Diff.        | 95,00% CI of diff.   |            | Below threshold? | Summary  | Adjusted P Value |
| placebo vs. S1 4.5                  |        | -0,007189         | -0,04007 to 0,02570  |            | No               | ns       | 0,7963           |
| placebo vs. GBZ 4.5                 |        | 0,03304           | 0,0001548 to 0,06595 |            | Yes              | *        | 0,049            |
| Test details                        |        | Mean 1            | Mean 2               | Mean Diff. | SE of diff.      | n1       |                  |
| placebo vs. S1 4.5                  |        | 0,07              | 0,07719              | -0,007189  | 0,01258          | 4        |                  |
| placebo vs. GBZ 4.5                 |        | 0,07              | 0,03696              | 0,03304    | 0,01258          | 4        |                  |
| <b>Table Analyzed</b>               |        | <b>Trib3 24H</b>  |                      |            |                  |          |                  |
| ANOVA summary                       |        |                   |                      |            |                  |          |                  |
| F                                   | 9,211  |                   |                      |            |                  |          |                  |
| P value                             | 0,0066 |                   |                      |            |                  |          |                  |
| P value summary                     |        |                   |                      |            |                  |          |                  |
| ANOVA table                         |        | SS                | DF                   | MS         | F (DFn, DFd)     | P value  |                  |
| Treatment (between columns)         |        | 0,01494           | 2                    | 0,007471   | F (2, 9) = 9,211 | P=0,0066 |                  |
| Residual (within columns)           |        | 0,0073            | 9                    | 0,0008111  |                  |          |                  |
| Total                               |        | 0,02224           | 11                   |            |                  |          |                  |
| Dunnett's multiple comparisons test |        | Mean Diff.        | 95,00% CI of diff.   |            | Below threshold? | Summary  | Adjusted P Value |
| placebo vs. S1 4.5                  |        | -0,006128         | -0,05877 to 0,04652  |            | No               | ns       | 0,9352           |
| placebo vs. GBZ 4.5                 |        | 0,0716            | 0,01896 to 0,1242    |            | Yes              | *        | 0,0113           |
| Test details                        |        | Mean 1            | Mean 2               | Mean Diff. | SE of diff.      | n1       |                  |
| placebo vs. S1 4.5                  |        | 0,1153            | 0,1215               | -0,006128  | 0,02014          | 4        |                  |
| placebo vs. GBZ 4.5                 |        | 0,1153            | 0,04374              | 0,0716     | 0,02014          | 4        |                  |
| <b>Table Analyzed</b>               |        | <b>Gadd34 24H</b> |                      |            |                  |          |                  |
| ANOVA summary                       |        |                   |                      |            |                  |          |                  |
| F                                   | 0,2901 |                   |                      |            |                  |          |                  |
| P value                             | 0,755  |                   |                      |            |                  |          |                  |
| P value summary                     |        |                   |                      |            |                  |          |                  |
| ANOVA table                         |        | SS                | DF                   | MS         | F (DFn, DFd)     | P value  |                  |
| Treatment (between columns)         |        | 0,0005901         | 2                    | 0,000295   | F (2, 9) = 0,290 | P=0,7550 |                  |
| Residual (within columns)           |        | 0,009154          | 9                    | 0,001017   |                  |          |                  |
| Total                               |        | 0,009744          | 11                   |            |                  |          |                  |

**Supp. Fig. 5**

| <b>Table Analyzed</b>                   |  | <b>ADRA2A2</b>                                              |                    |                  |                   |                  |     |          |    |  |  |
|-----------------------------------------|--|-------------------------------------------------------------|--------------------|------------------|-------------------|------------------|-----|----------|----|--|--|
| Unpaired t test                         |  |                                                             |                    |                  |                   |                  |     |          |    |  |  |
| P value                                 |  | 0,0022                                                      |                    |                  |                   |                  |     |          |    |  |  |
| P value summary                         |  | **                                                          |                    |                  |                   |                  |     |          |    |  |  |
| One- or two-tailed P value?             |  | One-tailed                                                  |                    |                  |                   |                  |     |          |    |  |  |
| t, df                                   |  | t=15,09, df=2                                               |                    |                  |                   |                  |     |          |    |  |  |
| Mean of - $\alpha$ 2                    |  | 0,00135                                                     |                    |                  |                   |                  |     |          |    |  |  |
| Mean of + $\alpha$ 2                    |  | 124,6                                                       |                    |                  |                   |                  |     |          |    |  |  |
| 95% confidence interval                 |  | 89,07 to 160,1                                              |                    |                  |                   |                  |     |          |    |  |  |
| <b>Table Analyzed</b>                   |  | <b>min <math>\alpha</math>2 XBP1s/u, without ER stress</b>  |                    |                  |                   |                  |     |          |    |  |  |
| ANOVA summary                           |  |                                                             |                    |                  |                   |                  |     |          |    |  |  |
| F                                       |  | 0,8886                                                      |                    |                  |                   |                  |     |          |    |  |  |
| P value                                 |  | 0,4444                                                      |                    |                  |                   |                  |     |          |    |  |  |
| P value summary                         |  | ns                                                          |                    |                  |                   |                  |     |          |    |  |  |
| ANOVA table                             |  | SS                                                          | DF                 | MS               | F (DFn, DFd)      | P value          |     |          |    |  |  |
| Treatment (between columns)             |  | 0,01802                                                     | 2                  | 0,009009         | F (2, 9) = 0,8886 | P=0,4444         |     |          |    |  |  |
| Residual (within columns)               |  | 0,09125                                                     | 9                  | 0,01014          |                   |                  |     |          |    |  |  |
| Total                                   |  | 0,1093                                                      | 11                 |                  |                   |                  |     |          |    |  |  |
| <b>Table Analyzed</b>                   |  | <b>plus <math>\alpha</math>2 XBP1s/u, without ER stress</b> |                    |                  |                   |                  |     |          |    |  |  |
| Kruskal-Wallis test                     |  |                                                             |                    |                  |                   |                  |     |          |    |  |  |
| P value                                 |  | 0,941                                                       |                    |                  |                   |                  |     |          |    |  |  |
| Exact or approximate P value?           |  | Exact                                                       |                    |                  |                   |                  |     |          |    |  |  |
| Do the medians vary signif. (P < 0.05)? |  | No                                                          |                    |                  |                   |                  |     |          |    |  |  |
| Number of groups                        |  | 3                                                           |                    |                  |                   |                  |     |          |    |  |  |
| Kruskal-Wallis statistic                |  | 0,1538                                                      |                    |                  |                   |                  |     |          |    |  |  |
| <b>Table Analyzed</b>                   |  | <b>min <math>\alpha</math>2 XBP1s/u, ER stress</b>          |                    |                  |                   |                  |     |          |    |  |  |
| Mann Whitney test                       |  |                                                             |                    |                  |                   |                  |     |          |    |  |  |
| P value                                 |  | 0,0011                                                      |                    |                  |                   |                  |     |          |    |  |  |
| Exact or approximate P value?           |  | Exact                                                       |                    |                  |                   |                  |     |          |    |  |  |
| P value summary                         |  | **                                                          |                    |                  |                   |                  |     |          |    |  |  |
| One- or two-tailed P value?             |  | One-tailed                                                  |                    |                  |                   |                  |     |          |    |  |  |
| Sum of ranks in column A,E              |  | 21, 57                                                      |                    |                  |                   |                  |     |          |    |  |  |
| Mann-Whitney U                          |  | 0                                                           |                    |                  |                   |                  |     |          |    |  |  |
| Median of DMSO                          |  | 0,9441, n=6                                                 |                    |                  |                   |                  |     |          |    |  |  |
| Median of TG                            |  | 13,78, n=6                                                  |                    |                  |                   |                  |     |          |    |  |  |
| Difference: Actual                      |  | 12,83                                                       |                    |                  |                   |                  |     |          |    |  |  |
| Difference: Hodges-Lehmann              |  | 12,77                                                       |                    |                  |                   |                  |     |          |    |  |  |
| <b>Table Analyzed</b>                   |  | <b>min <math>\alpha</math>2 XBP1s/u, ER stress</b>          |                    |                  |                   |                  |     |          |    |  |  |
| ANOVA summary                           |  |                                                             |                    |                  |                   |                  |     |          |    |  |  |
| F                                       |  | 4,532                                                       |                    |                  |                   |                  |     |          |    |  |  |
| P value                                 |  | 0,0289                                                      |                    |                  |                   |                  |     |          |    |  |  |
| P value summary                         |  | *                                                           |                    |                  |                   |                  |     |          |    |  |  |
| ANOVA table                             |  | SS                                                          | DF                 | MS               | F (DFn, DFd)      | P value          |     |          |    |  |  |
| Treatment (between columns)             |  | 106                                                         | 2                  | 52,98            | F (2, 15) = 4,532 | P=0,0289         |     |          |    |  |  |
| Residual (within columns)               |  | 175,4                                                       | 15                 | 11,69            |                   |                  |     |          |    |  |  |
| Total                                   |  | 281,3                                                       | 17                 |                  |                   |                  |     |          |    |  |  |
| Dunnett's multiple comparisons test     |  | Mean Diff,                                                  | 95,00% CI of diff, | Below threshold? | Summary           | Adjusted P Value | E-? |          |    |  |  |
| TG 0,33 $\mu$ M vs. TG + S1             |  | 5,595                                                       | 0,7794 to 10,41    | Yes              | *                 | 0,0232           | F   | TG + S1  |    |  |  |
| TG 0,33 $\mu$ M vs. TG + GBZ            |  | 4,533                                                       | -0,2819 to 9,349   | No               | ns                | 0,0655           | G   | TG + GBZ |    |  |  |
| Test details                            |  | Mean 1                                                      | Mean 2             | Mean Diff,       | SE of diff,       | n1               | n2  | q        | DF |  |  |
| TG 0,33 $\mu$ M vs. TG + S1             |  | 13,83                                                       | 8,235              | 5,595            | 1,974             | 6                | 6   | 2,834    | 15 |  |  |
| TG 0,33 $\mu$ M vs. TG + GBZ            |  | 13,83                                                       | 9,296              | 4,533            | 1,974             | 6                | 6   | 2,297    | 15 |  |  |
| <b>Table Analyzed</b>                   |  | <b>plus <math>\alpha</math>2 XBP1s/u, ER stress</b>         |                    |                  |                   |                  |     |          |    |  |  |
| Mann Whitney test                       |  |                                                             |                    |                  |                   |                  |     |          |    |  |  |
| P value                                 |  | 0,0022                                                      |                    |                  |                   |                  |     |          |    |  |  |
| Exact or approximate P value?           |  | Exact                                                       |                    |                  |                   |                  |     |          |    |  |  |
| P value summary                         |  | **                                                          |                    |                  |                   |                  |     |          |    |  |  |
| One- or two-tailed P value?             |  | One-tailed                                                  |                    |                  |                   |                  |     |          |    |  |  |
| Sum of ranks in column A,E              |  | 21, 45                                                      |                    |                  |                   |                  |     |          |    |  |  |
| Mann-Whitney U                          |  | 0                                                           |                    |                  |                   |                  |     |          |    |  |  |
| Median of DMSO                          |  | 1,085, n=6                                                  |                    |                  |                   |                  |     |          |    |  |  |
| Median of TG                            |  | 13,79, n=5                                                  |                    |                  |                   |                  |     |          |    |  |  |
| Difference: Actual                      |  | 12,71                                                       |                    |                  |                   |                  |     |          |    |  |  |
| Difference: Hodges-Lehmann              |  | 12,58                                                       |                    |                  |                   |                  |     |          |    |  |  |
| <b>Table Analyzed</b>                   |  | <b>plus <math>\alpha</math>2 XBP1s/u, ER stress</b>         |                    |                  |                   |                  |     |          |    |  |  |
| ANOVA summary                           |  |                                                             |                    |                  |                   |                  |     |          |    |  |  |
| F                                       |  | 19,35                                                       |                    |                  |                   |                  |     |          |    |  |  |
| P value                                 |  | 0,0001                                                      |                    |                  |                   |                  |     |          |    |  |  |
| P value summary                         |  | ***                                                         |                    |                  |                   |                  |     |          |    |  |  |
| ANOVA table                             |  | SS                                                          | DF                 | MS               | F (DFn, DFd)      | P value          |     |          |    |  |  |
| Treatment (between columns)             |  | 238,8                                                       | 2                  | 119,4            | F (2, 13) = 19,35 | P=0,0001         |     |          |    |  |  |
| Residual (within columns)               |  | 80,22                                                       | 13                 | 6,171            |                   |                  |     |          |    |  |  |
| Total                                   |  | 319                                                         | 15                 |                  |                   |                  |     |          |    |  |  |
| Dunnett's multiple comparisons test     |  | Mean Diff,                                                  | 95,00% CI of diff, | Below threshold? | Summary           | Adjusted P Value | E-? |          |    |  |  |
| TG 0,33 $\mu$ M vs. TG + S1             |  | 9,509                                                       | 5,622 to 13,40     | Yes              | ****              | <0,0001          | F   | TG + S1  |    |  |  |
| TG 0,33 $\mu$ M vs. TG + GBZ            |  | 6,596                                                       | 2,875 to 10,32     | Yes              | **                | 0,0014           | G   | TG + GBZ |    |  |  |
| Test details                            |  | Mean 1                                                      | Mean 2             | Mean Diff,       | SE of diff,       | n1               | n2  | q        | DF |  |  |
| TG 0,33 $\mu$ M vs. TG + S1             |  | 13,78                                                       | 4,27               | 9,509            | 1,571             | 5                | 5   | 6,052    | 13 |  |  |
| TG 0,33 $\mu$ M vs. TG + GBZ            |  | 13,78                                                       | 7,182              | 6,596            | 1,504             | 5                | 6   | 4,385    | 13 |  |  |

### Supp. Data CatWalk WT-VWM placebo

| Category                            | Parameter                            | Paws                               | Analysis                                  | VWM placebo vs WT placebo          |
|-------------------------------------|--------------------------------------|------------------------------------|-------------------------------------------|------------------------------------|
| RUN CHARACTERIZATION                | Duration (s)                         | All                                | p < 0.0001 (KW)                           | 0 (t)                              |
|                                     | Cadence (steps/s)                    | All                                | p < 0.0001 (KW)                           | 0 (t)                              |
|                                     | Average speed (cm/s)                 | All                                | p < 0.0001 (KW)                           | 0 (t)                              |
|                                     | Number of steps (#)                  | All                                | p < 0.0001 (KW)                           | 0 (t)                              |
|                                     | Maximum variation (%)                | All                                | p = 0.416 (KW)                            | -                                  |
| INTERLIMB COORDINATION              | Base of support (cm)                 | FP<br>HP                           | p < 0.0001 (AN)<br>p = 0.279 (KW)         | 0.984                              |
|                                     | Stride length (cm)                   | FP<br>HP                           | p < 0.0001 (KW)<br>p < 0.0001 (KW)        | 0 (t)                              |
|                                     | Step sequence - Regularity index (%) | All                                | p < 0.0001 (KW)                           | 0.006 (t)                          |
|                                     | Support Lateral (%)                  | All                                | p < 0.0001 (KW)                           | 0 (t)                              |
|                                     | Support Single (%)                   | All                                | p = 0.001 (KW)                            | 0.001 (t)                          |
|                                     | Support Girdle (%)                   | All                                | p < 0.0001 (KW)                           | 0 (t)                              |
|                                     | Support Diagonal (%)                 | All                                | p < 0.0001 (KW)                           | 0 (t)                              |
|                                     | Support Three (%)                    | All                                | p < 0.0001 (KW)                           | 0.009 (t)                          |
|                                     | Support Four (%)                     | All                                | p = 0.023 (KW)                            | 0.787                              |
|                                     | Stand (s)                            | FP<br>HP                           | p < 0.0001 (AN, LOG10)<br>p < 0.0001 (KW) | 0 (t)<br>0.002 (t)                 |
|                                     | Swing (s)                            | FP<br>HP                           | p < 0.0001 (KW)<br>p < 0.0001 (KW)        | 0.001 (t)<br>0 (t)                 |
| Step cycle (s)                      | FP<br>HP                             | p < 0.0001 (AN)<br>p < 0.0001 (KW) | 0 (t)<br>0 (t)                            |                                    |
| Duty cycle (s)                      | FP<br>HP                             | p < 0.0001 (AN)<br>p = 0.048 (KW)  | 0.001 (t)<br>0.697                        |                                    |
| Single stance (s)                   | FP<br>HP                             | p < 0.0001 (KW)<br>p < 0.0001 (KW) | 0.004 (t)<br>0 (t)                        |                                    |
| Initial dual stance (s)             | FP<br>HP                             | p < 0.0001 (KW)<br>p < 0.0001 (KW) | 0.004 (t)<br>0.061                        |                                    |
| Terminal dual stance (s)            | FP<br>HP                             | p < 0.0001 (KW)<br>p < 0.0001 (KW) | 0.003 (t)<br>0.552                        |                                    |
| Max intensity At (%)                | FP<br>HP                             | p < 0.0001 (KW)<br>p < 0.0001 (KW) | 0 (t)<br>0 (t)                            |                                    |
| Max contact At (%)                  | FP<br>HP                             | p < 0.0001 (AN)<br>p = 0.001 (AN)  | 0.011 (t)<br>0.702                        |                                    |
| KINETIC                             | Stand Index                          | FP<br>HP                           | p < 0.0001 (KW)<br>p < 0.0001 (KW)        | 0.452<br>0.001 (t)                 |
|                                     | Swing speed (cm/s)                   | FP<br>HP                           | p < 0.0001 (KW)<br>p < 0.0001 (KW)        | 0 (t)<br>0 (t)                     |
|                                     | Body speed (cm/s)                    | FP<br>HP                           | p < 0.0001 (KW)<br>p < 0.0001 (KW)        | 0 (t)<br>0 (t)                     |
|                                     | Body speed variation (cm/s)          | FP<br>HP                           | p = 0.169 (KW)<br>p = 0.195 (KW)          | -<br>-                             |
|                                     | SPATIAL                              | Print length (cm)                  | FP<br>HP                                  | p < 0.0001 (KW)<br>p < 0.0001 (KW) |
| Print width (cm)                    |                                      | FP<br>HP                           | p < 0.0001 (KW)<br>p < 0.0001 (AN)        | 0 (t)<br>0 (t)                     |
| Print area (cm <sup>2</sup> )       |                                      | FP<br>HP                           | p < 0.0001 (KW)<br>p < 0.0001 (AN)        | 0 (t)<br>0 (t)                     |
| Max contact area (cm <sup>2</sup> ) |                                      | FP<br>HP                           | p < 0.0001 (KW)<br>p < 0.0001 (AN, LOG10) | 0 (t)<br>0 (t)                     |
| Max contact max intensity (AU)      |                                      | FP<br>HP                           | p < 0.0001 (KW)<br>p < 0.0001 (KW)        | 0 (t)<br>0 (t)                     |
| Max contact mean intensity (AU)     |                                      | FP<br>HP                           | p < 0.0001 (KW)<br>p < 0.0001 (KW)        | 0 (t)<br>0.016 (t)                 |
| Max intensity (AU)                  |                                      | FP<br>HP                           | p < 0.0001 (KW)<br>p < 0.0001 (KW)        | 0 (t)<br>0 (t)                     |
| Mean intensity (AU)                 |                                      | FP<br>HP                           | p < 0.0001 (KW)<br>p < 0.0001 (KW)        | 0 (t)<br>0.009 (t)                 |
| Min intensity (AU)                  |                                      | FP<br>HP                           | p = 0.587 (AN, LOG10)<br>p = 0.287 (KW)   | -<br>-                             |

Supp. Data CatWalk VWM treatment

| Category                        | Parameter                            | Paws            | Analysis               | VWM GBZ D4.5 vs VWM placebo | VWM GBZ W10 vs VWM placebo | VWM GBZ D4.5 vs VWM placebo | VWM GBZ D4.5 vs WT D4.5 |
|---------------------------------|--------------------------------------|-----------------|------------------------|-----------------------------|----------------------------|-----------------------------|-------------------------|
| RUN CHARACTERIZATION            | Duration (s)                         | All             | p < 0.0001 (KW)        | 0.086                       | 0 (I)                      | 0 (I)                       | 0.013 (I)               |
|                                 | Cadence (steps/s)                    | All             | p < 0.0001 (KW)        | 0.254                       | 0.026 (I)                  | 0 (I)                       | 0.04 (I)                |
|                                 | Average speed (cm/s)                 | All             | p < 0.0001 (KW)        | 0.086                       | 0 (I)                      | 0 (I)                       | 0.016 (I)               |
| INTERLIMB COORDINATION          | Number of steps (#)                  | All             | p < 0.0001 (KW)        | 0.024 (I)                   | 0.006 (I)                  | 0 (I)                       | 0.002 (I)               |
|                                 | Stride length (cm)                   | FP              | p < 0.0001 (KW)        | 0.021 (I)                   | 0 (I)                      | 0 (I)                       | 0 (I)                   |
|                                 | Step sequence - Regularity index (%) | HP              | p < 0.0001 (KW)        | 0.21                        | 0 (I)                      | 0 (I)                       | 0.001 (I)               |
| TEMPORAL                        | Support Lateral (%)                  | All             | p < 0.0001 (KW)        | 0.616                       | 0.006 (I)                  | 0.001 (I)                   | 0.636                   |
|                                 | Support Single (%)                   | All             | p < 0.001 (KW)         | 0.21                        | 0.11                       | 0.006 (I)                   | 0.949                   |
|                                 | Support Cradle (%)                   | All             | p < 0.0001 (KW)        | 0.638                       | 0.005 (I)                  | 0 (I)                       | 0.363                   |
|                                 | Support Diagonal (%)                 | All             | p < 0.0001 (KW)        | 0.023 (I)                   | 0.001 (I)                  | 0 (I)                       | 0.007 (I)               |
|                                 | Support These (%)                    | All             | p < 0.0001 (KW)        | 0.119                       | 0.035 (I)                  | 0.003 (I)                   | 0.004 (I)               |
|                                 | Stand (s)                            | FP              | p < 0.0001 (AN, LDG10) | 0.715                       | 0.861                      | 0 (I)                       | 0.738                   |
|                                 |                                      | HP              | p < 0.0001 (KW)        | 0.047 (I)                   | 0.043 (I)                  | 0 (I)                       | 0.019 (I)               |
|                                 | Swing (s)                            | FP              | p < 0.0001 (KW)        | 0.897                       | 0.036 (I)                  | 0.829                       | 0.028 (I)               |
|                                 |                                      | HP              | p < 0.0001 (KW)        | 0.616                       | 0.002 (I)                  | 0 (I)                       | 0.681                   |
|                                 | Step cycle (s)                       | FP              | p < 0.0001 (AN)        | 0.294                       | 1                          | 0 (I)                       | 0.276                   |
| KINETIC                         | Duty cycle (s)                       | HP              | p < 0.0001 (KW)        | 0.086                       | 0.001 (I)                  | 0 (I)                       | 0.023 (I)               |
|                                 | Single stance (s)                    | FP              | p < 0.0001 (AN)        | 0.809                       | 0.011 (I)                  | 0 (I)                       | 0.661                   |
|                                 |                                      | HP              | p < 0.0001 (KW)        | 0.515                       | 0.004 (I)                  | 0.984                       | 0.019 (I)               |
|                                 | Initial dual stance (s)              | FP              | p < 0.0001 (KW)        | 0.724                       | 0.004 (I)                  | 0 (I)                       | 0.656                   |
|                                 | Terminal dual stance (s)             | FP              | p < 0.0001 (KW)        | 0.073                       | 0.007                      | 0 (I)                       | 0.028 (I)               |
|                                 |                                      | HP              | p < 0.0001 (KW)        | 0.119                       | 0.011 (I)                  | 0 (I)                       | 0.19                    |
|                                 | Max intensity AI (%)                 | FP              | p < 0.0001 (KW)        | 0.879                       | 0.21                       | 0 (I)                       | 0.169                   |
|                                 |                                      | HP              | p < 0.0001 (KW)        | 0.094                       | 0.16                       | 0.012 (I)                   | 0.392                   |
|                                 | Max contact AI (%)                   | FP              | p < 0.0001 (AN)        | 0.984                       | 0.93                       | 0.977                       | 0.067                   |
|                                 | Stand index                          | HP              | p < 0.0001 (KW)        | 0.21                        | 0.003 (I)                  | 0 (I)                       | 0.023 (I)               |
| SPATIAL                         | Swing speed (cm/s)                   | FP              | p < 0.0001 (KW)        | 0.119                       | 0.002 (I)                  | 0 (I)                       | 0.008 (I)               |
|                                 |                                      | HP              | p < 0.0001 (KW)        | 0.867                       | 0.003 (I)                  | 0 (I)                       | 0.028 (I)               |
|                                 | Body speed (cm/s)                    | FP              | p < 0.0001 (KW)        | 0.043 (I)                   | 0 (I)                      | 0 (I)                       | 0.016 (I)               |
| SPATIAL                         |                                      | HP              | p < 0.0001 (KW)        | 0.056                       | 0 (I)                      | 0 (I)                       | 0.019 (I)               |
|                                 | Print length (cm)                    | FP              | p < 0.0001 (KW)        | 0.638                       | 0.126                      | 0.984                       | 0 (I)                   |
|                                 |                                      | HP              | p < 0.0001 (KW)        | 0.11                        | 0.381                      | 0.072                       | 0.548                   |
|                                 | Print width (cm)                     | FP              | p < 0.0001 (KW)        | 0.27                        | 0 (I)                      | 0 (I)                       | 0.357                   |
|                                 |                                      | HP              | p < 0.0001 (AN)        | 0.826                       | 0.994                      | 0.42                        | 0.57                    |
|                                 | Print area (cm <sup>2</sup> )        | FP              | p < 0.0001 (KW)        | 0.287                       | 0.102                      | 0.83                        | 0.003 (I)               |
|                                 |                                      | HP              | p < 0.0001 (AN)        | 0.819                       | 1                          | 0.35                        | 1                       |
|                                 | Max contact area (cm <sup>2</sup> )  | FP              | p < 0.0001 (KW)        | 0.486                       | 0.224                      | 0.77                        | 0.007 (I)               |
|                                 |                                      | HP              | p < 0.0001 (AN, LDG10) | 0.767                       | 0.049 (I)                  | 0.049 (I)                   | 1                       |
|                                 | Max contact max intensity (AU)       | FP              | p < 0.0001 (KW)        | 0.445                       | 0.023 (I)                  | 0.006 (I)                   | 0.365                   |
|                                 | HP                                   | p < 0.0001 (KW) | 0.491                  | 0.149                       | 0 (I)                      | 0.975                       |                         |
| Max contact mean intensity (AU) | FP                                   | p < 0.0001 (KW) | 0.491                  | 0.051                       | 0.045 (I)                  | 0.238                       |                         |
|                                 | HP                                   | p < 0.0001 (KW) | 0.616                  | 0.061                       | 0 (I)                      | 0.265                       |                         |
| Max intensity (AU)              | FP                                   | p < 0.0001 (KW) | 0.239                  | 0.102                       | 0.072                      | 0.294                       |                         |
|                                 | HP                                   | p < 0.0001 (KW) | 0.696                  | 0.21                        | 0 (I)                      | 0.778                       |                         |
| Mean intensity (AU)             | FP                                   | p < 0.0001 (KW) | 0.323                  | 0.08                        | 0.232                      | 1                           |                         |
|                                 | HP                                   | p < 0.0001 (KW) | 0.616                  | 0.08                        | 0 (I)                      | 0.265                       |                         |



### Supp. Data CatWalk WT treatment

| Category               | Parameter                            | Paws            | Analysis               | WT S1 D4.5 vs<br>WT placebo | WT GB2 W10 vs<br>WT placebo | WT GB2 D4.5 vs<br>WT placebo |
|------------------------|--------------------------------------|-----------------|------------------------|-----------------------------|-----------------------------|------------------------------|
| RUN CHARACTERIZATION   | Duration (s)                         | All             | p < 0.0001 (KW)        | 1                           | 0.574                       | 0.065                        |
|                        | Cadence (steps/s)                    | All             | p < 0.0001 (KW)        | 0.442                       | 0.721                       | 0.328                        |
|                        | Average speed (cm/s)                 | All             | p < 0.0001 (KW)        | 0.328                       | 0.959                       | 0.382                        |
|                        | Number of steps (#)                  | All             | p < 0.0001 (KW)        | 0.958                       | 0.875                       | 0.207                        |
| INTERLIMB COORDINATION | Stride length (cm)                   | FP              | p < 0.0001 (KW)        | 0.959                       | 0.721                       | 0.279                        |
|                        |                                      | HP              | p < 0.0001 (KW)        | 0.878                       | 0.905                       | 0.505                        |
|                        | Step sequence - Regularity index (%) | All             | p < 0.0001 (KW)        | 0.916                       | 0.833                       | 0.342                        |
|                        | Support Lateral (%)                  | All             | p < 0.0001 (KW)        | 0.585                       | 0.161                       | 0.006 (I)                    |
|                        | Support Single (%)                   | All             | p = 0.001 (KW)         | 0.701                       | 0.153                       | 0.15                         |
|                        | Support Girdle (%)                   | All             | p < 0.0001 (KW)        | 0.873                       | 0.155                       | 0.709                        |
|                        | Support Diagonal (%)                 | All             | p < 0.0001 (KW)        | 0.721                       | 0.878                       | 0.234                        |
|                        | Support Three (%)                    | All             | p < 0.0001 (KW)        | 0.646                       | 0.959                       | 0.13                         |
|                        |                                      |                 |                        |                             |                             |                              |
| Max contact AI (%)     | FP                                   | p < 0.0001 (AN) | 1                      | 0.921                       | 0.862                       |                              |
| TEMPORAL               | Stand (s)                            | FP              | p < 0.0001 (AN, LOG10) | 0.999                       | 0.993                       | 0.955                        |
|                        |                                      | HP              | p < 0.0001 (KW)        | 0.878                       | 0.442                       | 0.234                        |
|                        | Swing (s)                            | FP              | p < 0.0001 (KW)        | 0.05                        | 0.959                       | 0.279                        |
|                        |                                      | HP              | p < 0.0001 (KW)        | 0.038 (I)                   | 0.721                       | 0.234                        |
|                        | Step cycle (s)                       | FP              | p < 0.0001 (AN)        | 0.987                       | 0.996                       | 0.972                        |
|                        |                                      | HP              | p < 0.0001 (KW)        | 0.721                       | 0.505                       | 0.279                        |
|                        | Duty cycle (s)                       | FP              | p < 0.0001 (AN)        | 0.999                       | 0.992                       | 0.35                         |
|                        |                                      | HP              | p < 0.0001 (KW)        | 0.065                       | 0.574                       | 0.789                        |
|                        | Single stance (s)                    | FP              | p < 0.0001 (KW)        | 0.028 (I)                   | 0.574                       | 0.574                        |
|                        |                                      | HP              | p < 0.0001 (KW)        | 0.721                       | 0.382                       | 0.105                        |
|                        | Initial dual stance (s)              | FP              | p < 0.0001 (KW)        | 0.645                       | 0.382                       | 0.234                        |
|                        | Terminal dual stance (s)             | FP              | p < 0.0001 (KW)        | 1                           | 0.878                       | 0.007 (I)                    |
|                        | Max intensity AI (%)                 | HP              | p < 0.0001 (KW)        | 0.13                        | 0.574                       | 0.13                         |
|                        | Max contact AI (%)                   | FP              | p < 0.0001 (AN)        | 1                           | 0.921                       | 0.862                        |
| KINETIC                | Stand index                          | HP              | p < 0.0001 (AN)        | 0.574                       | 0.279                       | 0.161                        |
|                        | Swing speed (cm/s)                   | FP              | p < 0.0001 (KW)        | 0.195                       | 0.645                       | 1                            |
|                        |                                      | HP              | p < 0.0001 (KW)        | 0.105                       | 0.789                       | 1                            |
|                        | Body speed (cm/s)                    | FP              | p < 0.0001 (KW)        | 0.442                       | 0.959                       | 0.328                        |
|                        |                                      | HP              | p < 0.0001 (KW)        | 0.382                       | 0.959                       | 0.382                        |
| SPATIAL                | Print length (cm)                    | FP              | p < 0.0001 (KW)        | 0.574                       | 0.01 (I)                    | 0 (I)                        |
|                        |                                      | HP              | p < 0.0001 (KW)        | 0.721                       | 0.442                       | 0.001 (I)                    |
|                        | Print width (cm)                     | FP              | p < 0.0001 (KW)        | 0.442                       | 0.442                       | 0.279                        |
|                        |                                      | HP              | p < 0.0001 (AN)        | 1                           | 0.79                        | 0.001 (I)                    |
|                        | Print area (cm <sup>2</sup> )        | FP              | p < 0.0001 (KW)        | 0.195                       | 0.038 (I)                   | 0 (I)                        |
|                        |                                      | HP              | p < 0.0001 (AN)        | 1                           | 0.958                       | 0.003 (I)                    |
|                        | Max contact area (cm <sup>2</sup> )  | FP              | p < 0.0001 (KW)        | 0.195                       | 0.105                       | 0 (I)                        |
|                        |                                      | HP              | p < 0.0001 (AN, LOG10) | 1                           | 0.871                       | 0.001 (I)                    |
|                        | Max contact max intensity (AU)       | FP              | p < 0.0001 (KW)        | 0.105                       | 0.645                       | 0.001 (I)                    |
|                        |                                      | HP              | p < 0.0001 (KW)        | 1                           | 0.959                       | 0.161                        |
|                        | Max contact mean intensity (AU)      | FP              | p < 0.0001 (KW)        | 0.065                       | 0.442                       | 0.002 (I)                    |
|                        |                                      | HP              | p < 0.0001 (KW)        | 0.789                       | 0.789                       | 0.442                        |
|                        | Max intensity (AU)                   | FP              | p < 0.0001 (KW)        | 0.028 (I)                   | 0.13                        | 0 (I)                        |
|                        | HP                                   | p < 0.0001 (KW) | 0.878                  | 0.878                       | 0.161                       |                              |
| Mean intensity (AU)    | FP                                   | p < 0.0001 (KW) | 0.105                  | 0.234                       | 0 (I)                       |                              |
|                        | HP                                   | p < 0.0001 (KW) | 1                      | 0.878                       | 0.234                       |                              |
